1                   **A simplified cell-based assay to identify coronavirus 3CL protease inhibitors**

2

3 Samuel J. Resnick<sup>1,2</sup>, Sho Iketani<sup>3,4</sup>, Seo Jung Hong<sup>1</sup>, Arie Zask<sup>5</sup>, Hengrui Liu<sup>6</sup>, Sungsoo Kim<sup>1</sup>,  
4 Schuyler Melore<sup>1</sup>, Manoj S. Nair<sup>3</sup>, Yaoxing Huang<sup>3</sup>, Nicholas E.S. Tay<sup>6</sup>, Tomislav Rovis<sup>6</sup>, Hee Won  
5 Yang<sup>1</sup>, Brent R. Stockwell<sup>5,6\*</sup>, David D. Ho<sup>3\*</sup>, Alejandro Chavez<sup>1\*</sup>

6

7 <sup>1</sup> Department of Pathology and Cell Biology, Columbia University Irving Medical Center, New York,  
8 NY, 10032, USA

9 <sup>2</sup> Medical Scientist Training Program, Columbia University Irving Medical Center, New York, NY,  
10 10032, USA

11 <sup>3</sup> Aaron Diamond AIDS Research Center, Columbia University Irving Medical Center, New York, NY,  
12 10032, USA

13 <sup>4</sup> Department of Microbiology and Immunology, Columbia University Irving Medical Center, New  
14 York, NY, 10032, USA

15 <sup>5</sup> Department of Biological Sciences, Columbia University, New York, NY, 10027, USA

16 <sup>6</sup> Department of Chemistry, Columbia University, New York, NY, 10027, USA

17

18 **\*Correspondence to:** [ac4304@cumc.columbia.edu](mailto:ac4304@cumc.columbia.edu); [dh2994@cumc.columbia.edu](mailto:dh2994@cumc.columbia.edu);  
19 [bstockwell@columbia.edu](mailto:bstockwell@columbia.edu)

20

21 **Abstract**

22 We describe a mammalian cell-based assay capable of identifying coronavirus 3CL protease  
23 (3CLpro) inhibitors without requiring the use of live virus. By enabling the facile testing of compounds  
24 across a range of coronavirus 3CLpro enzymes, including the one from SARS-CoV-2, we are able to  
25 quickly identify compounds with broad or narrow spectra of activity. We further demonstrate the  
26 utility of our approach by performing a curated compound screen along with structure-activity  
27 profiling of a series of small molecules to identify compounds with antiviral activity. Throughout these  
28 studies, we observed concordance between data emerging from this assay and from live virus  
29 assays. By democratizing the testing of 3CL inhibitors to enable screening in the majority of  
30 laboratories rather than the few with extensive biosafety infrastructure, we hope to expedite the  
31 search for coronavirus 3CL protease inhibitors, to address the current epidemic and future ones that  
32 will inevitably arise.

### 33 **Introduction**

34 The outbreak of a novel coronavirus (SARS-CoV-2) infection of the past several months has  
35 paralyzed countries around the world<sup>1,2</sup>. This crisis is further exacerbated by the dearth of approved  
36 therapeutics, leaving physicians with few proven treatment options. In the past two decades, the  
37 world has already suffered from two other major coronavirus outbreaks, Severe Acute Respiratory  
38 Syndrome (SARS) and Middle East Respiratory Syndrome (MERS), suggesting that coronaviruses  
39 represent a real and ever-present threat to global health that must be addressed<sup>3</sup>. Yet, even if  
40 therapeutics against the existing epidemic strains are identified, there are several hundred other  
41 coronaviruses in active circulation within animal populations, many with the theoretical potential to  
42 infect humans. To help identify therapeutics for the current epidemic along with preparing for the  
43 next, there is a need for readily deployable small molecule screening assays that enable the  
44 identification of therapeutics that are broad-acting across a large collection of coronavirus strains.

45  
46 During coronavirus infection, the RNA genome is delivered into cells and translated into a pair of  
47 polyproteins<sup>4</sup>. These polyproteins are then processed by a set of virally encoded proteases, of which  
48 the three-chymotrypsin-like protease (3CLpro) performs the majority of cleavage events<sup>4</sup>. As a result  
49 of its essential role in viral replication and high degree of conservation across all coronaviruses,  
50 3CLpro enzymes represent important targets for therapeutic drug development<sup>5,6</sup>. Previous work  
51 expressing a variety of viral proteases within yeast and mammalian cellular systems have shown  
52 that protease expression can lead to profound cellular toxicity, which can be rescued by the addition  
53 of protease inhibitors<sup>7-12</sup>. We hypothesized that if the expression of coronavirus 3CLpro enzymes  
54 within mammalian cells leads to a similar toxic phenotype, this could form the basis of an easily  
55 implemented mammalian cell-based assay to evaluate protease inhibitors. While multiple assays  
56 exist to evaluate protease inhibitors, an assay of the nature we envisioned has clear advantages, as  
57 it requires minimal upfront cost or effort, is accessible to many biomedical research labs, does not  
58 involve the use of live virus, and requires no specialized reporter to read out protease activity. In  
59 contrast, *in vitro* protease assays using purified protein have formed the backbone of inhibitor

60 screening, but require upfront efforts to isolate the pure protease and are not conducted under  
61 physiologic cellular conditions<sup>13,14</sup>. In addition, if one desires to identify broad-acting coronavirus  
62 inhibitors, one must purify and identify experimental conditions suitable for testing each protease *in*  
63 *vitro*. An alternative approach for identifying protease inhibitors is the use of live virus which is  
64 performed under more biologically relevant conditions, assuming relevant host cell systems can be  
65 identified, but requires intensive safety training and specialized biosafety protocols<sup>15</sup>. For many  
66 coronaviruses, no live virus assay exists, limiting the ability to test compounds within mammalian cell  
67 systems to a small subset of all coronaviruses<sup>16</sup>. Furthermore, compounds with activity against live  
68 virus may function through a number of mechanisms other than protease inhibition which cannot be  
69 readily determined, and may lead to undesired off-target activities which are not realized until much  
70 later in the drug development process<sup>17,18</sup>.

71  
72 Here, we report a mammalian cell-based assay to identify coronavirus 3CLpro inhibitors that does  
73 not require the use of live virus. We demonstrate the utility of the assay using the SARS-CoV-2  
74 3CLpro, with EC<sub>50</sub> values obtained from the assay showing good concordance with traditional live  
75 virus testing for multiple compounds. We next establish the generality of the approach by testing a  
76 diverse set of 3CLpro enzymes. Finally, we perform a small molecule screen, along with structure-  
77 activity profiling of a set of compounds to find those with enhanced antiviral activity. The presented  
78 data support the use of our assay system for the discovery of small molecule 3CLpro inhibitors and  
79 the rapid characterization of their activity across multiple coronaviruses to identify those with broad  
80 inhibitory activity.

81

82

## 83 **Results**

84 **Expression of the SARS-CoV-2 3CLpro in HEK293T cells results in cell toxicity and can be**  
85 **used as a readout of drug activity**

86 Prior work has shown that the exogenous expression of viral proteases within cellular systems can  
87 result in growth suppression or cell death. Motivated by this work, we sought to determine the effect  
88 of expressing the SARS-CoV-2 3CLpro in HEK293T cells. Utilizing a cost-effective crystal-violet-  
89 based approach to quantify cell abundance, we observed that expression of SARS-CoV-2 3CLpro  
90 results in significant growth inhibition as compared to the expression of a control protein, enhanced  
91 yellow fluorescent protein (EYFP) (Fig. 1a-b)<sup>19</sup>. This suppression of growth was dependent upon the  
92 catalytic function of the enzyme, as mutating cysteine 145, which is essential for the enzyme's  
93 peptidase activity, abolished the growth defect (Fig. 1a-b). We sought to determine if the observed  
94 growth defect could be rescued by incubating cells with GC376, a feline coronavirus inhibitor that  
95 was recently reported to have activity against SARS-CoV-2 3CLpro<sup>20</sup>. In comparison to untreated  
96 control cells, the addition of GC376 led to a robust increase in cell growth (Fig. 1c-d).

97

98 **Compound rescue of transfected 3CLpro cytotoxicity is similar to results obtained with live**  
99 **virus**

100 We next tested if this transfection-based assay could be used to determine compound EC<sub>50</sub> values  
101 and whether the values showed any correlation with those obtained with live virus. After incubating  
102 SARS-CoV-2 3CLpro transfected cells with a range of GC376 concentrations, we calculated an EC<sub>50</sub>  
103 of 3.30 μM, which is similar to published values reported using live virus on Vero E6 (EC<sub>50</sub> 2.2 μM,  
104 0.9 μM, 0.18 μM, 4.48 μM) and Vero 76 cells (EC<sub>50</sub> 3.37 μM) (Fig. 2a and Table 1)<sup>20-24</sup>. We  
105 investigated the assay's tolerance to deviation by varying the amount of plasmid transfected or the  
106 number of cells seeded into wells containing compound (Supplementary Fig. 1). In all cases, the  
107 assay was robust to variation, delivering a similar EC<sub>50</sub> for GC376 across all conditions. We also  
108 tested an orthogonal method of quantifying cell abundance based on fluorescence microscopy and  
109 observed agreement with the results obtained with crystal violet staining (Supplementary Fig. 2).  
110 This suggests that the assay system is robust to variation and provides consistent results.

111

112 We next conducted dose-response profiling for two additional SARS-CoV-2 3CLpro inhibitors,  
113 compound 4 and compound 11a, and observed reversal of the toxic effect of the protease in a dose-  
114 dependent manner (Fig. 2b-c)<sup>25,26</sup>. In agreement with the results obtained with GC376, the EC<sub>50</sub>  
115 value for compound 4 was comparable to those obtained with live virus, 0.98 μM and 3.023 μM,  
116 respectively (Table 1)<sup>24</sup>. Unexpectedly, we calculated an EC<sub>50</sub> of 6.89 μM for 11a, which is  
117 approximately 10-fold higher than the literature reported value of 0.53 μM, based on viral plaque  
118 assay<sup>26</sup>. We have noticed that literature reported EC<sub>50</sub> values from live virus testing could range over  
119 an order of magnitude depending on the exact method employed, as is the case for GC376 (Table  
120 1). To resolve this discrepancy between the transfection-based approach and the live virus assay,  
121 we conducted live virus testing of 11a using the commonly employed readout of cytopathic effect in  
122 Vero E6 cells and observed closer concordance with our transfection-based results (Supplementary  
123 Figure 3 and Table 1)<sup>20,24,27</sup>. To measure the toxicity of each compound, we exposed EYFP-  
124 transfected cells to each molecule and determined CC<sub>50</sub> values (Fig. 2). We also calculated the  
125 selectivity index (SI) for each compound tested in this study (Supplementary Table 1).

126

127 We hypothesized that the assay would be able to distinguish between compounds that are only  
128 active on the purified SARS-CoV-2 3CLpro and those that are able to inhibit the live virus through  
129 protease inhibition. In general, we observe concordance between compounds showing activity within  
130 this transfection-based 3CL assay and live virus studies (Supplementary Fig. 4a-e)<sup>13</sup>. However,  
131 within the assay, we did not observe activity for ebselen, a small molecule with demonstrated activity  
132 against the SARS-CoV-2 3CLpro *in vitro* and activity against the SARS-CoV-2 live virus  
133 (Supplementary Fig. 4f). We suggest that this may be due to ebselen targeting more than 3CLpro  
134 within the live virus assay, which is in line with work showing that ebselen is highly reactive and  
135 readily forms selenosulfide bonds with numerous proteins including the SARS-CoV-2 papain-like  
136 protease (PLP)<sup>18,28,29</sup>.

137

138 **Demonstrating assay compatibility across a range of coronavirus 3CLpro enzymes**

139 We hypothesized that this assay may be used to study other coronavirus 3CLpros to enable users to  
140 identify broad-acting inhibitors, as constructs containing other 3CLpro enzymes could be readily  
141 synthesized. To test the assay's generality, we created expression constructs for 3CL proteases  
142 from five other coronaviruses (SARS-CoV, MERS-CoV, Bat-CoV-HKU9, HCoV-NL63 and IBV) with  
143 variable amino acid identity compared with SARS-CoV-2 3CLpro (Supplementary Fig. 5a). For each  
144 of these proteases, we confirmed that expression in mammalian cells resulted in toxicity that is  
145 dependent upon the enzyme's catalytic activity (Supplementary Fig. 5b). Next, we tested GC376,  
146 compound 4, and 11a across this panel of proteases. GC376, a drug originally identified for use  
147 against the Feline Infectious Peritonitis virus, showed  $EC_{50} < 10 \mu M$  for the most, but not all of  
148 proteases tested<sup>30</sup>. Unexpectedly, compound 4, which was originally designed as a SARS-CoV  
149 3CLpro inhibitor showed particular potency against IBV 3CLpro ( $EC_{50} = 0.058 \mu M$ ) along with broad  
150 activity ( $EC_{50} < 10 \mu M$ ) for all other 3CL proteases tested. In contrast to GC376 and compound 4, 11a  
151 had a relatively narrow activity spectrum with  $EC_{50} < 10 \mu M$  against only SARS-CoV and SARS-CoV-  
152 2 3CLpro enzymes (Fig. 3). Of note, in all cases where previous live virus data was available, the  
153  $EC_{50}$  values obtained from this transfection-based assay were similar (Table 1).

154

### 155 **Rapid testing to identify SARS-CoV-2-3CL protease inhibitors**

156 Having further determined the assay's ability to examine the effects of active individual compounds,  
157 we sought to determine its suitability for small molecule screening. Before performing the screen, we  
158 optimized the testing parameters to ensure suitable performance characteristics (Supplementary Fig.  
159 6 and Methods)<sup>31</sup>. We compiled a collection of 162 diverse protease inhibitors, along with  
160 compounds with reported *in vitro* activity against 3CLpro enzymes or structural similarity to known  
161 3CLpro inhibitors (Supplementary Table 2 and Supplementary Table 3). Of the nearly 200  
162 compounds tested, two potent hits were identified, GC373 and GRL-0496 (Fig. 4a, Supplementary  
163 Table 2)<sup>32</sup>.

164

165 We noted that GC373 is structurally similar to its prodrug GC376, except for the change of the  
166 bisulfide salt adduct to an aldehyde warhead<sup>22,33</sup>. Additional testing of GC373 revealed it to have a  
167 similar EC<sub>50</sub> as GC376 in both the transfection assay and when tested against live SARS-CoV-2  
168 virus, suggesting that the differences in structure has a minimal effect on their potency  
169 (Supplementary Fig. 7 and Table 1), although solubility may be affected<sup>33</sup>. The other hit from the  
170 screen, GRL-0496, shares structural similarity to several other compounds within the library, one of  
171 which is a previously reported 3CLpro inhibitor (MAC-5576) that failed to show activity against  
172 SARS-CoV-2 in a live virus assay<sup>24,34</sup>. Additional testing of GRL-0496 revealed it to have an EC<sub>50</sub> of  
173 5.05 μM against SARS-CoV-2 3CLpro within our transfection-based assay (Fig. 4c). To verify GRL-  
174 0496's activity, we tested it against live SARS-CoV-2 virus, and confirmed its potency (EC<sub>50</sub> = 9.12  
175 μM) (Fig. 4d). We next tested GRL-0496 against the full panel of 3CLpro enzymes we had previously  
176 examined and observed a narrow range of activity, with EC<sub>50</sub> <10 μM only observed against SARS-  
177 CoV 3CLpro and SARS-CoV-2 3CLpro, in agreement with previous live virus testing (Supplementary  
178 Fig. 8 and Table 1)<sup>27</sup>. We also tested GC373 against the full panel of 3CLpro enzymes and observed  
179 concordance with GC376, with SARS-CoV 3CLpro, MERS-CoV 3CL pro, and IBV 3CL pro  
180 demonstrating an EC<sub>50</sub> <10 μM (Supplementary Fig. 8).

181

## 182 **Discussion**

183 Given the potential for protease inhibitors in the treatment of viral illnesses, small molecule inhibitors  
184 of coronavirus 3CL proteases represent a promising avenue for treating infections caused by this  
185 large family of viruses. Here, we present a simplified assay to identify candidate inhibitors under  
186 physiologic cellular conditions. This approach presents significant advantages over other methods to  
187 detect 3CL protease inhibitory activity with its ease of use and ability to be performed with equipment  
188 and reagents commonly available to many biomedical research laboratories. While conventional  
189 methods for identifying 3CL protease inhibitors make use of *in vitro* purified protease, the isolation of  
190 sufficiently pure enzyme in its native state can be costly and labor intensive. Furthermore, assays  
191 using purified protease fail to consider cell permeability and the influence of the extracellular and



192 intracellular milieu on compound activity. In comparison to live virus-based assays, the outlined  
193 approach does not require extensive biosafety containment. These data also suggest that the  
194 approach described here is applicable to a number of coronaviruses for which live virus assays may  
195 not be available or would be deemed ethically challenging to be performed even with extensive  
196 biosafety infrastructure<sup>35,36</sup>. Finally, because the phenotype assayed within this approach is driven  
197 solely by protease activity, it may enable the distinction between compounds with multiple biological  
198 targets and subsequent potential for off-target toxicity from those that function primarily as 3CLpro  
199 inhibitors.

200  
201 A number of surrogate assays that aim to identify molecules with activity against proteins encoded  
202 by SARS-CoV-2 have recently been reported<sup>37-39</sup>. These assays were developed to provide  
203 physiologically meaningful molecule testing without needing to use live SARS-CoV-2 cultures in  
204 order to allow for rapid testing and widespread adoption to labs without necessary safety  
205 infrastructure. The aforementioned assays have focused primarily on identifying neutralizing  
206 antibodies targeted at the SARS-CoV-2 spike (S) protein. To our knowledge, a reporter-free  
207 surrogate assay to identify coronavirus 3CL protease inhibitors validated with multiple known  
208 coronavirus 3CL protease inhibitors has not been reported.

209  
210 Within the literature,  $EC_{50}$  values obtained for a 3CLpro inhibitor against live virus can show a broad  
211 range of potency, with some compounds demonstrating  $EC_{50}$  values across multiple orders of  
212 magnitude (Table 1). These differences appear to be driven by variation in experimental setup such  
213 as cell line used, assay readout, incubation period, and initial concentration of virus added. While we  
214 have observed agreement between the  $EC_{50}$  values obtained from the described transfection-based  
215 method and those reported in the literature, given the differences in  $EC_{50}$  across assays, we suggest  
216 caution when comparing results across studies. By developing this transfection-based 3CLpro  
217 testing platform, we hope to facilitate the discovery of new coronavirus inhibitors while also  
218 facilitating the comparison of existing inhibitors within a single simplified assay system. Furthermore,

219 we propose that this cellular protease assay system could be industrialized to screen and optimize a  
220 large number of compounds to discover potential treatments for future viral pandemics.

221

## 222 **Methods**

### 223 **Cell Lines and Cell Culture**

224 HEK293T and HEK293 cells used in this study were obtained from ATCC. Cells were maintained at  
225 37°C in a humidified atmosphere with 5% CO<sub>2</sub>. HEK293T and HEK293 cells were grown in  
226 Dulbecco's Modified Eagle Medium (DMEM, Invitrogen) which was supplemented with 10% fetal  
227 bovine serum (Gibco) and penicillin-streptomycin (Invitrogen). HEK293T and HEK293 cells were  
228 confirmed to be free of mycoplasma contamination with the Agilent MycoSensor PCR Assay Kit.  
229 To obtain HEK293 cells stably expressing EYFP, cells were co-transfected with EYFP plasmids  
230 harboring the *piggyBac* transposon (pPB bsr2-EYFP) (Yusa et al., 2009) and pCMV-mPBase  
231 (mammalian codon-optimized PBase) encoding a piggyBac transposase using Lipofectamine 2000  
232 (Invitrogen) according to the manufacturer's instructions. One day after transfection, the transfected  
233 cells were selected with 10 µg/mL of blasticidin (Invitrogen).

234

### 235 **Transfections and Drug Selections**

236 24 h prior to transfection, 293T cells were seeded at 65-75% confluency into 24-well plates coated  
237 for 30 min with a 1 mg/mL solution of poly-D-lysine (MP Biomedicals Inc.) and washed with PBS  
238 (Gibco) once prior to media addition. The next day, 500 ng of 3CLpro expression plasmid, unless  
239 otherwise stated, was incubated with Opti-MEM and Lipofectamine 2000 for 30 min at room  
240 temperature prior to dribbling on cells, as per manufacturer's protocol. For plating into drug  
241 conditions, 20 h after transfection, cells were washed once with PBS and 200 µL Trypsin-EDTA  
242 0.25% (Gibco) was added to cells to release them from the plate. Trypsinized cell slurry was pipetted  
243 up and down repeatedly to ensure a single cell suspension. 96-well plates were coated with poly-D-  
244 lysine, either coated manually with 1 µg/mL poly-D-lysine in PBS solution for 30 min or purchased  
245 pre-coated with poly-D-lysine (Corning). Wells were filled with 100 µL of media ± drug and 1 µg/mL

246 puromycin and were seeded with 9  $\mu$ L of trypsinized cell slurry. For higher throughput experiments,  
247 multiple individually transfected wells of a 24-well plate were combined after trypsinization and prior  
248 to seeding in drug. After seeding into wells containing drug and puromycin, cells were incubated for  
249 48 h unless otherwise specified.

250

## 251 **Plasmids**

252 All vectors used in this study were cloned into the pLEX307 backbone (Addgene #41392) using  
253 Gateway LR II Clonase Enzyme mix (Invitrogen). 3CL proteases used in this study were generated  
254 using gene fragments ordered from Twist Biosciences. Inactive 3CL proteases were generated by  
255 site directed mutagenesis of the essential catalytic cysteine. DNA was transformed into NEB 10-beta  
256 high efficiency competent cells. Sanger sequencing to verify proper inserts were done for all  
257 plasmids used in this study (Genewiz).

258

259 Plasmid DNA was isolated using standard miniprep buffers (Omega Biotek) and silica membrane  
260 columns (Biobasic). To reduce batch-to-batch variability between plasmid DNA isolations and its  
261 subsequent impact on transfection efficiency, multiple plasmid DNA extractions were conducted in  
262 parallel, diluted to 50 ng/ $\mu$ L and pooled together.

263

## 264 **Crystal Violet Staining and Quantification**

265 The crystal violet staining protocol was adapted from Feoktistova et. al.<sup>19</sup> Briefly, after compound  
266 incubation with 3CLpro expressing cells in 96-well plates, the medium was discarded and cells were  
267 washed once with PBS. Cells were incubated with 50  $\mu$ L of crystal violet staining solution (0.5%  
268 crystal violet in 80% water and 20% methanol) and rocked gently for 30 min. The staining solution  
269 was removed and cells were washed four times with water using a multichannel pipette. Stained  
270 cells were left to dry for  $\geq$ 4 h on the laboratory bench or within the chemical hood. The crystal violet  
271 staining solution was eluted by the addition of 200  $\mu$ L of methanol over the course of 30 min with  
272 gentle rocking. Plates were sealed with parafilm to mitigate methanol evaporation. 100  $\mu$ L of eluted

273 stain from each well was transferred to a new 96-well plate for reading in a Tecan Infinite F50 plate  
274 reader. Absorbance was measured at 595 nm twice and values were averaged between replicate  
275 measurements. Blank wells were included in each batch of experiments, and absorbance values  
276 were normalized by background levels of staining from blank wells.

277

### 278 **Statistical Analysis of Dose Response Curves**

279 For analysis of crystal violet staining experiments, relative growth was calculated from background  
280 normalized absorbance values. Test wells containing drug were divided by average background  
281 normalized values from wells where cells were expressing protease and exposed to vehicle, when  
282 available. Otherwise, values were normalized by values from protease-expressing cells exposed to  
283 the lowest concentration of drug included in the dose-response curve. When there were significant  
284 deviations from protease-expressing cells exposed to no drug and protease-expressing cells  
285 exposed to lowest concentrations of drug included in the dose-response curve, experiments were  
286 repeated with normalization by protease-expressing cells exposed to no drug.  $CC_{50}$  values were  
287 calculated in Prism using the nonlinear regression functionality and derived from dose-response  
288 curves with EYFP transfected cells. A nonlinear curve fitting function accounting for variable curve  
289 slopes was calculated by plotting the normalized response as a function of  $\log(\text{compound})$ . Similarly,  
290  $EC_{50}$  values were calculated in GraphPad Prism also using the nonlinear regression functionality. A  
291 nonlinear curve fitting function measuring the stimulatory response of a compound as a function of  
292 an unnormalized response was used to calculate the  $EC_{50}$ . All reported values were confirmed to not  
293 have ambiguous curve fitting. The 95% confidence interval of  $EC_{50}$  calculations was also calculated  
294 and included.

295

296 For analysis of live virus experiments,  $EC_{50}$  values were determined by fitting a nonlinear curve to  
297 the data with the assumption of a normalized response (GraphPad Prism). Cells were confirmed as  
298 mycoplasma negative prior to use.

299

300 **Compound Screening**

301 For screening condition optimization, we measured the Z-Factor for replicates of positive controls  
302 GC376, tested at 50  $\mu$ M, and compound 4, tested at 20  $\mu$ M. Replicate measurements were recorded  
303 for DMSO negative controls and positive control compounds after 48, 72, and 96 h of incubation with  
304 drug. Background normalized crystal violet absorbance values at each timepoint were collected.

305

306 During the drug screen, within each of the four plates screened, two positive controls wells were  
307 included to ensure assay reliability, along with several wells with the negative control 0.1% DMSO  
308 condition. All compounds were screened at 10  $\mu$ M resuspended in DMSO (Fisher Scientific).

309 For hit selection, we employed a robust z-score method. We first normalized data using a robust z-  
310 score that uses median and median absolute deviation (MAD) instead of mean and standard  
311 deviation. We then used a threshold of 3.5 MAD to determine which drugs rescued the cytotoxicity  
312 imposed by expression of the viral protease<sup>40</sup>.

313

314 **Live Virus Assay**

315 The SARS-CoV-2 strain 2019-nCoV/USA\_WA1/2020 was grown and titered in Vero-E6 cells. One  
316 day before the experiment, Vero-E6 cells were seeded at 30,000 cells/well in 96 well-plates. Serial  
317 dilutions of the test compound were prepared in media (EMEM + 10% FCS +  
318 penicillin/streptomycin), pipetted onto cells, and virus was subsequently added to each well at an  
319 MOI of 0.2. Cells were incubated at in a humidified environment at 37 °C with 5% CO<sub>2</sub> for 72 h after  
320 addition of virus. Cytopathic effect was scored by independent, blinded researchers. The reported  
321 cytopathic effect value represents the average from two independent reviewers. Percent Inhibition  
322 was calculated by comparison to control wells with no inhibitor added. All live virus experiments were  
323 conducted in a biosafety level 3 lab.

324

325 **Microscopy**

326 Cells plated on a 96-well plate (Greiner Bio-One™) and washed once immediately before imaging.  
327 EYFP fluorescence imaging was performed using an Axio Observer 7 microscope (Zeiss) equipped  
328 with a Plan-Apochromat 10X objective (0.45 N.A.) with 1-by-1 pixel binning. Optical Illumination bias  
329 was empirically derived by sampling background areas and subsequently used to flatten images.  
330 After a global background subtraction, cell density was calculated based on area of EYFP intensity.

331

### 332 **Compounds and Chemical Synthesis**

333 GC376 was purchased from Aobious. Myrecetin, rupintrivir, grazoprevir, saquinavir, fosamprenavir,  
334 indinavir, apigenin, quercetin, famotidine, MDL28170, bicailein, betrixaban, and amentoflavone were  
335 purchased from Fisher Scientific. Tipranavir was purchased from Cayman Chemical. MAC5576,  
336 MAC22272, MAC8120, MAC30731, BTB07404, BTB07408, MWP00332, BTB07417, MWP00508,  
337 MWP00333, BTB07407, SPB08384, SPB06613, SPB06636, SPB06591, SPB06593, MWP00709,  
338 CC42746, BTB07789, BTB07420, MWP00710, BTB07421, SCR00533, and SEW03089 were  
339 purchased from Maybridge. GRL-0496 and GRL-0617 were purchased from Focus Biomolecules.  
340 AZVIII-40A (1,2-Benzisothiazol-3(2H)-one) was purchased from Alfa Aesar. Other protease inhibitors  
341 in table below were purchased from TargetMol.

342

| CAS Number   | Drug Name               | CAS Number   | Drug Name                     |
|--------------|-------------------------|--------------|-------------------------------|
| 1226781-44-7 | Omarigliptin            | 134381-21-8  | Epoxomicin                    |
| 79183-19-0   | Apoptosis Activator 2   | 110044-82-1  | MG101                         |
| 3731-52-0    | Picolamine              | 125697-93-0  | lavendustin C                 |
| 541-91-3     | Muscone                 | 729607-74-3  | BMS707035                     |
| 60-23-1      | 2-Aminoethanethiol      | 630420-16-5  | Asunaprevir                   |
| 51146-56-6   | Dexibuprofen            | 76684-89-4   | Loxistatin Acid               |
| 3416-24-8    | Glucosamine             | 1025015-40-0 | GK921                         |
| 56974-61-9   | Gabexate mesylate       | 292632-98-5  | L-685,458                     |
| 7481-89-2    | Zalcitabine             | 202138-50-9  | Tenofovir Disoproxil Fumarate |
| 2016-88-8    | Amiloride hydrochloride | 937174-76-0  | GSK690693                     |
| 945667-22-1  | Saxagliptin hydrate     | 1256388-51-8 | Ledipasvir                    |
| 668270-12-0  | Linagliptin             | 960374-59-8  | ONX0914                       |
| 486460-32-6  | Sitagliptin             | 1401223-22-0 | PI1840                        |
| 136-77-6     | Hexylresorcinol         | 13552-72-2   | (+)-Isocorydine hydrochloride |

|              |                                    |              |                            |
|--------------|------------------------------------|--------------|----------------------------|
| 497-76-7     | Arbutin                            | 697797-51-6  | UAMC 00039 dihydrochloride |
| 908-54-3     | Diminazene Aceturate               | 1402727-29-0 | PE859                      |
| 6419-36-9    | 3-Pyridylacetic acid hydrochloride | 847925-91-1  | RO4929097                  |
| 81110-73-8   | Racecadotril                       | 254750-02-2  | Emricasan                  |
| 50924-49-7   | Mizoribine                         | 161314-82-5  | CGS 27023A                 |
| 7414-83-7    | Sodium etidronate                  | 150080-09-4  | Talabostat mesylate        |
| 103-16-2     | Monobenzone                        | 1441674-54-9 | Ledipasvir acetone         |
| 1180-71-8    | Limonin                            | 130370-60-4  | Batimastat                 |
| 472-15-1     | Betulinic acid                     | 54857-86-2   | TOFA                       |
| 329-98-6     | PMSF                               | 1009734-33-1 | HZ1157                     |
| 42017-89-0   | Fenofibric acid                    | 188062-50-2  | Abacavir sulfate           |
| 196597-26-9  | Ramelteon                          | 127373-66-4  | Sivelestat                 |
| 155213-67-5  | Ritonavir                          | 1132935-63-7 | Dasabuvir                  |
| 850649-62-6  | Alogliptin Benzoate                | 20575-57-9   | Calycosin                  |
| 179324-69-7  | Bortezomib                         | 673-22-3     | 4-Methoxysalicylaldehyde   |
| 546-88-3     | Acetohydroxamic acid               | 111-20-6     | Sebacic acid               |
| 129618-40-2  | Nevirapine                         | 53936-56-4   | Deoxyarbutin               |
| 192725-17-0  | Lopinavir                          | 490-78-8     | 2-5-dihydroxyacetophenone  |
| 39809-25-1   | Penciclovir                        | 29700-22-9   | Oxyresveratrol             |
| 916170-19-9  | AOB2796                            | 88321-09-9   | Aloxistatin                |
| 176161-24-3  | Maribavir                          | 864953-29-7  | Fostemsavir                |
| 1029877-94-8 | Trelagliptin succinate             | 519055-62-0  | Tasisulam                  |
| 1201902-80-8 | MLN9708                            | 425386-60-3  | Semagacestat               |
| 354812-17-2  | SC514                              | 35943-35-2   | Triciribine                |
| 1072833-77-2 | Ixazomib                           | 331862-41-0  | IMR-1A                     |
| 871038-72-1  | Raltegravir potassium              | 310456-65-6  | IMR1                       |
| 863329-66-2  | PSI6206                            | 210344-98-2  | Z-IETD-FMK                 |
| 82009-34-5   | Cilastatin                         | 1624602-30-7 | VR23                       |
| 480-18-2     | Taxifolin                          | 161814-49-9  | Amprenavir                 |
| 82956-11-4   | Nafamostat mesylate                | 1312782-34-5 | AA26-9                     |
| 1009119-65-6 | Daclatasvir dihydrochloride        | 1051375-16-6 | Dolutegravir               |
| 635728-49-3  | Darunavir Ethanolate               | 1026785-59-0 | Lomibuvir                  |
| 142880-36-2  | Ilomastat                          | 112246-15-8  | Ginsenoside Rh2            |
| 697761-98-1  | Elvitegravir                       | 256477-09-5  | UK371804                   |
| 1051375-19-9 | Dolutegravir sodium                | 147859-80-1  | CA-074 methyl ester        |
| 84687-43-4   | Astragaloside IV                   | 1404437-62-2 | ML281                      |
| 7770-78-7    | Arctigenin                         | 591778-68-6  | CP 640186                  |
| 83-48-7      | Stigmasterol                       | 5631-68-5    | Hydroumbellic acid         |
| 478-01-3     | Nobiletin                          | 831-61-8     | Ethyl gallate              |
| 34157-83-0   | Celastrol                          | 2469-34-3    | Senegenin                  |
| 29031-19-4   | Glucosamine sulfate                | 28831-65-4   | lithospermic acid          |

|              |                              |              |                                |
|--------------|------------------------------|--------------|--------------------------------|
| 27409-30-9   | Picoside I                   | 209984-56-5  | Dibenzazepine                  |
| 848141-11-7  | Alvelestat                   | 209984-57-6  | LY411575                       |
| 128-53-0     | N-Ethylmaleimide             | 1221573-85-8 | Paritaprevir                   |
| 208255-80-5  | DAPT                         | 1190307-88-0 | Sofosbuvir                     |
| 865759-25-7  | Trelagliptin                 | 1421438-81-4 | Crenigacestat                  |
| 187389-52-2  | Z-VAD(OMe)-FMK               | 1338225-97-0 | Doravirine                     |
| 514-10-3     | Abietic Acid                 | 847499-27-8  | Delanzomib                     |
| 229975-97-7  | Atazanavir sulfate           | 25406-64-8   | Morrionside                    |
| 136470-78-5  | Abacavir                     | 20633-67-4   | Calycosin-7-O-beta-D-glucoside |
| 354813-19-7  | Balicatib                    | 59870-68-7   | Glabridin                      |
| 868540-17-4  | Carfilzomib                  | 58749-22-7   | Licochalcone A                 |
| 198904-31-3  | Atazanavir                   | 1377049-84-7 | Velpatasvir                    |
| 274901-16-5  | Vildagliptin                 | 402957-28-2  | Telaprevir                     |
| 244767-67-7  | Dapivirine                   | 603139-19-1  | Odanacetib                     |
| 292605-14-2  | SB-3CT                       | 206361-99-1  | Darunavir                      |
| 179461-52-0  | PD 151746                    | 850876-88-9  | Danoprevir                     |
| 315183-21-2  | PAC1                         | 159989-65-8  | Nelfinavir Mesylate            |
| 59721-29-8   | Camostat mesilate            | 935888-69-0  | Oprozomib                      |
| 154598-52-4  | Efavirenz                    | 30827-99-7   | AEBSF hydrochloride            |
| 1192224-24-0 | Des(benzylpyridyl) Atazanavi | 273404-37-8  | Belnacasan                     |
| 1194044-20-6 | LY2811376                    | 210344-95-9  | Z-DEVD-FMK                     |
| 313967-18-9  | FLI06                        | 197855-65-5  | Z-FA-FMK                       |
| 218156-96-8  | SRPIN340                     | 149488-17-5  | Trovirdine                     |
| 7497-07-6    | NSC 405020                   | 133407-82-6  | MG132                          |
| 103476-89-7  | Leupeptin Hemisulfate        | 1051375-10-0 | Cabotegravir                   |
| 57-11-4      | Stearic acid                 | 1146699-66-2 | Avagacestat                    |

343

344 All other compounds used in the study were synthesized and quality checked according to the

345 following protocols.

346

347

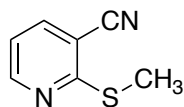

348 2-(methylthio)nicotinonitrile (xx-1) The title compound was prepared according to a published

349 procedure; spectral data are in agreement with literature values<sup>41</sup>.



350  $^1\text{H}$  NMR (500 MHz,  $\text{CDCl}_3$ )  $\delta$  8.60 (dd,  $J = 5.0, 1.8$  Hz, 1H), 7.79 (dd,  $J = 7.7, 1.8$  Hz, 1H), 7.07  
351 (dd,  $J = 7.7, 4.9$  Hz, 1H), 2.64 (s, 3H).

352  $^{13}\text{C}$  NMR (126 MHz,  $\text{CDCl}_3$ )  $\delta$  163.7, 152.2, 140.6, 118.4, 115.7, 107.5, 13.4.

353 HRMS High accuracy (ASAP): Calculated for  $\text{C}_7\text{H}_6\text{N}_2\text{S}$  ( $\text{M}+\text{H}$ ) $^+$ : 151.0330; found: 151.0327.

354

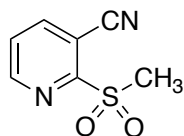

356 2-(methylsulfonyl)nicotinonitrile (xx-2) The title compound was prepared from xx-1 according to  
357 a modified procedure from the literature<sup>42</sup>.

358

359 Pyridine xx-1 (87 mg, 0.58 mmol, 1 equiv) was weighed into 50 mL round bottom flask equipped  
360 with a stir bar. The solid was dissolved in 10 mL of anhydrous MeOH, followed by portion-wise  
361 (usually 3 portions) additions of mCPBA (500 mg, 2.9 mmol, 5 equiv). Substrate conversion was  
362 monitored via TLC analysis (70% EtOAc:Hex to 100% EtOAc), with up to an additional 5 equiv  
363 of mCPBA added if necessary. Upon complete conversion of starting material, the reaction was  
364 quenched with 20 mL of saturated aqueous  $\text{NaHCO}_3$ , diluted with an additional 20 mL of DCM.  
365 The layers were separated and the organic layer was further washed (2x) with 10 mL of of  
366 saturated aqueous  $\text{NaHCO}_3$ . The organic layer was then dried *in vacuo* and purified via silica  
367 gel column chromatography (100% EtOAc to 5% MeOH:EtOAc) to yield 51 mg (48% yield) of  
368 the desired sulfone as a white solid.

369  $^1\text{H}$  NMR (400 MHz,  $\text{CDCl}_3$ )  $\delta$  8.86 (dd,  $J = 4.8, 1.6$  Hz, 1H), 8.26 (dd,  $J = 7.9, 1.6$  Hz, 1H), 7.70  
370 (dd,  $J = 7.9, 4.8$  Hz, 1H), 3.39 (s, 3H).

371  $^{13}\text{C}$  NMR (101 MHz,  $\text{CDCl}_3$ )  $\delta$  159.8, 151.8, 143.8, 126.8, 113.2, 107.4, 40.1.

372 HRMS High accuracy (ASAP): Calculated for  $\text{C}_7\text{H}_6\text{N}_2\text{O}_2\text{S}$  ( $\text{M}+\text{H}$ ) $^+$ : 183.0228; found: 183.0223.

373

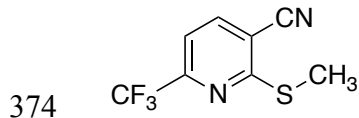

375 2-(methylthio)-6-(trifluoromethyl)nicotinonitrile (xx-3) The title compound was prepared following  
376 the published procedure, the product (yellow solid) was carried towards the synthesis of xx-4  
377 without further purification<sup>41</sup>.

378

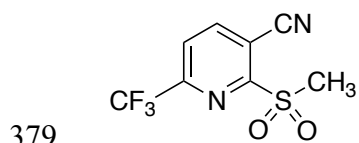

380 2-(methylsulfonyl)-6-(trifluoromethyl)nicotinonitrile (xx-4) The title compound was prepared from  
381 xx-3 according to a modified procedure from the literature<sup>42</sup>.

382

383 Pyridine xx-2 (105 mg, 0.50 mmol, 1 equiv) was weighed into 50 mL round bottom flask  
384 equipped with a stir bar. The solid was dissolved in 10 mL of anhydrous MeOH, followed by  
385 portion-wise (usually 3 portions) additions of mCPBA (0.86 mg, 5 mmol, 10 equiv). Substrate  
386 conversion was monitored via TLC analysis (40% EtOAc:Hex to 60% EtOAc). Upon complete  
387 conversion of starting material, the reaction was quenched with 20 mL of saturated aqueous  
388 NaHCO<sub>3</sub>, diluted with an additional 20 mL of DCM. The layers were separated and the organic  
389 layer was further washed (2x) with 10 mL of of saturated aqueous NaHCO<sub>3</sub>. The organic layer  
390 was then dried *in vacuo* and purified via silica gel column chromatography (40% to 80%  
391 EtOAc:Hex) to yield 38 mg (30% yield) of the desired sulfone as a white solid.

392 <sup>1</sup>H NMR (400 MHz, CDCl<sub>3</sub>) δ 8.49 (dd, *J* = 8.1, 0.7 Hz, 1H), 8.06 (d, *J* = 8.1 Hz, 1H).

393 <sup>13</sup>C NMR (101 MHz, CDCl<sub>3</sub>) δ 160.4, 149.7 (q, *J* = 37.6 Hz), 146.0, 123.7 (q, *J* = 2.3 Hz), 120.0  
394 (q, *J* = 275.5 Hz), 112.1, 109.7, 39.7.

395  $^{19}\text{F}$  NMR (376 MHz,  $\text{CDCl}_3$ )  $\delta$  -68.28.

396 HRMS High accuracy (ASAP): Calculated for  $\text{C}_8\text{H}_5\text{F}_3\text{N}_2\text{O}_2\text{S}$  ( $\text{M}+\text{H}$ ) $^+$ : 251.0102; found: 251.0104.

397

398 Compound 11a was synthesized according to the specified protocol in Dai. et. al. 2020<sup>26</sup>. Compound

399 11a was confirmed by LCMS with  $m/z$  = 453 ( $\text{M}+1$ ) and 451 ( $\text{M}-1$ ).

400

401 Compound 4 was synthesized according to the procedure described in Yang et. al 2006<sup>25</sup>. AZVIII-

402 34D was formed as a byproduct (15%) in the synthesis of Compound 4 and was isolated by RP

403 HPLC.  $^1\text{H}$  NMR (400 MHz,  $\text{CDCl}_3$ ) 7.88 (s, 1H), 7.44-7.34 (m, 5H), 6.80 (d, 1H,  $J$  = 15.4 Hz), 6.69 (s,

404 1H), 6.16-5.87 (m, 2H), 5.12 (s, 2H), 4.76 (s, 1H), 4.42 (s, 1H), 4.31-3.99 (m, 4H), 3.39 (s, 2H), 2.40-

405 1.45 (m, 8H), 1.29–1.20 (m, 12H), 1.13-1.02 (m, 3H), 1.00 – 0.89 (m, 6H). MS  $\text{M}+\text{H}$  = 631.

406

407 AZVIII-38, AZVIII-30, and AZVIII-42 were synthesized according the procedures described in Mou

408 et. al. 2008<sup>43</sup>. AZVIII-37A was synthesized as described in Prior et al. 2013. AZVIII-33B was

409 synthesized according to the method described in Amblard et. al. 2018<sup>44</sup>.

410

411 AZVIII-41A was synthesized according to the procedure described for synthesizing AZVIII-33B in

412 Amblard et. al. 2018 and substituting Z-Leu-OH for BOC-Leu-OH<sup>44</sup>.  $^1\text{H}$  NMR (400 MHz,  $\text{CDCl}_3$ ) 7.77

413 (s, 1H), 7.41-7.27 (m, 5H), 6.80 (dd, 1H,  $J$  = 5.5, 15.6 Hz), 5.98-5.84 (m, 2H), 5.15-5.03 (m, 2H),

414 4.55 (bd s, 1H), 4.27 (bd s, 1H), 4.23-4.07 (m, 3H), 3.38-3.23 (m, 2H), 2.56–1.40 (m, 8H), 1.33 –

415 1.20 (m, 3H), 0.95 (s, 6H). MS  $\text{M}+\text{H}$  = 474.

416

417 AZVII-43A was synthesized by treatment of a dichloromethane solution of AZVIII-30 and AZVIII-40A

418 with triphenyl phosphine and diethyl azodicarboxylate.  $^1\text{H}$  NMR (400 MHz,  $\text{CDCl}_3$ ) 7.91 (d, 1H,  $J$  =

419 8.0), 7.76 (d, 1H,  $J$  = 8.0), 7.55-7.34 (m, 2H), 6.16 (bd s, 1H), 5.29 (bd s, 1H), 4.73-4.39 (m, 2H),

420 4.35-3.96 (m, 1H), 3.58-3.16 (m, 2H), 3.79-3.43 (m, 2H), 3.39-3.91 (m, 1H), 1.98-1.77 (m, 1H), 1.73-

421 1.57 (m, 1H), 1.42 (s, 9H). MS  $\text{M}+\text{H}$  = 392.

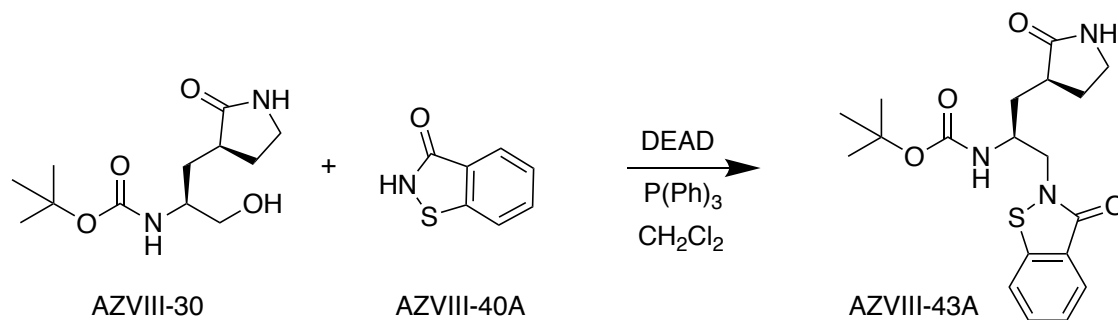

422

423

424 AZVIII-44B, AZVIII-44D, AZVIII-44E, AZVIII-44H, AZVIII-49C, and AZVIII-49F were synthesized by

425 treatment of the appropriate arylalkylamine or heteroarylalkylamine with the corresponding

426 arylsulfonyl chloride or heteroarylsulfonyl chloride and diisopropylethylamine in dichloromethane.

427 AZVIII-57D was synthesized by treatment of AZVIII-44D with methyl bromoacetate and potassium

428 carbonate in dimethylformamide to give the corresponding ester which was reduced to the

429 corresponding alcohol by treatment with lithium borohydride in tetrahydrofuran. The alcohol was

430 then treated with 1,1,1-tris(acetyloxy)-1,1-dihydro-1,2-benziodoxol-3-(1*H*)-one and sodium

431 bicarbonate in dichloromethane to give to the corresponding aldehyde AZVIII-57D. AZVIII-57G was

432 synthesized from *N*-benzyl-4-methoxybenzenesulfonamide according to the procedure used to

433 synthesize AZVIII-57D.

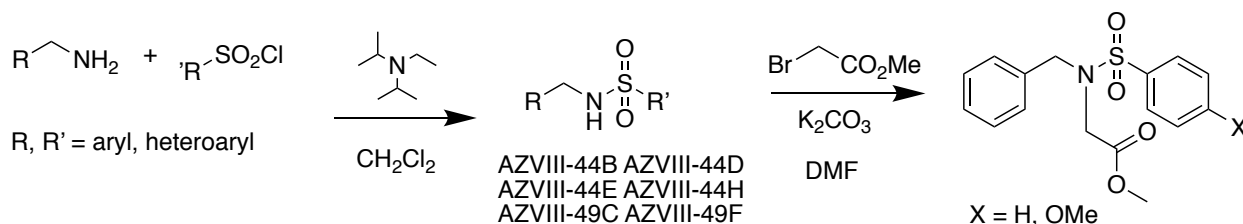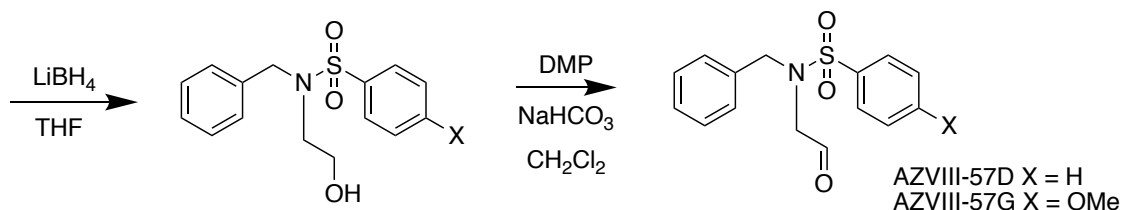

434

435 GC373 was synthesized from GC376 by converting the bisulfite group to an aldehyde group by

436 treatment with aqueous sodium bicarbonate. To a solution of 5.31 mg of GC376 in 200  $\mu\text{L}$   $\text{H}_2\text{O}$ , 2  $\mu\text{L}$

437 of saturated NaHCO<sub>3</sub> was added. The cloudy mixture was extracted with CH<sub>2</sub>Cl<sub>2</sub>, dried over Na<sub>2</sub>SO<sub>4</sub>,  
438 and concentrated in vacuo to give GC373 as a colorless oil (4.0 mg).

439 **Data availability**

440 All reagents generated in this study are without restriction. Plasmids generated in this study will be  
441 deposited to Addgene. Source data for all figures are provided with this manuscript online. All  
442 statistics were performed using Prism v.8.4.2.

443

444 **Acknowledgements**

445 Compound 11a was synthesized and generously provided by Shi-Xian Deng, Columbia University.  
446 This work was supported by a grant from the Jack Ma Foundation to D.D.H. and A.C. and by grants  
447 from Columbia Technology Ventures and the Columbia Translational Therapeutics (TRx) program to  
448 B.R.S. Further support for these studies comes from a pilot grant award from the Herbert Irving  
449 Comprehensive Cancer Center in partnership with the Irving Institute for Clinical and Translational  
450 Research at Columbia University to H.Y. and A.C. A.C. is also supported by a Career Awards for  
451 Medical Scientists from the Burroughs Wellcome Fund. S.J.R is supported by NIH grant  
452 F31NS111851. S.I. is supported by NIH grant T32AI106711.

453

454 **Author contributions**

455 S.J.R., S.I., and A.C conceived the project. S.J.R., S.I., B.R.S., D.D.H., and A.C. planned and  
456 designed the experiments. S.J.R. performed crystal violet-based assays. S.J.R. and S.K. performed  
457 the HEK293-EYFP based assays. S.J.R., S.I., and S.J.H. cloned plasmids. A.Z. and H.L.  
458 synthesized compounds and provided compound structure information for synthesized compounds.  
459 N.E.S.T. and T.R. synthesized compounds NT-1-21, NT-1-24, and NT-1-32. M.S.N. and Y.H.  
460 conducted the live virus assays. S.K. and H.Y. performed imaging and created the HEK293-EYFP  
461 cell line. S.J.R. and S.M. conducted data analysis. S.J.R, S.I., S.J.H, and A.C. wrote the manuscript  
462 with input from all authors.

463

464 **Competing interests**

465 S.I., H.L., A.Z., B.R.S., A.C., and D.D.H. are inventors on a patent application submitted based on  
466 some of the molecules described in this work. B.R.S. is an inventor on additional patents and patent  
467 applications related to small molecule therapeutics, and co-founded and serves as a consultant to  
468 Inzen Therapeutics and Nevrox Limited.

469 **References**

- 470 1. Wu, F. *et al.* A new coronavirus associated with human respiratory disease in China. *Nature*  
471 **579**, 265–269 (2020).
- 472 2. Zhou, P. *et al.* A pneumonia outbreak associated with a new coronavirus of probable bat origin.  
473 *Nature* **579**, 270–273 (2020).
- 474 3. Pillaiyar, T., Manickam, M., Namasivayam, V., Hayashi, Y. & Jung, S.-H. An Overview of Severe  
475 Acute Respiratory Syndrome–Coronavirus (SARS-CoV) 3CL Protease Inhibitors:  
476 Peptidomimetics and Small Molecule Chemotherapy. *J. Med. Chem.* **59**, 6595–6628 (2016).
- 477 4. de Wit, E., van Doremalen, N., Falzarano, D. & Munster, V. J. SARS and MERS: recent insights  
478 into emerging coronaviruses. *Nat. Rev. Microbiol.* **14**, 523–534 (2016).
- 479 5. Huang, C., Wei, P., Fan, K., Liu, Y. & Lai, L. 3C-like Proteinase from SARS Coronavirus  
480 Catalyzes Substrate Hydrolysis by a General Base Mechanism<sup>†</sup>. *Biochemistry* **43**, 4568–4574  
481 (2004).
- 482 6. Berry, M., Fielding, B. & Gamiieldien, J. Human coronavirus OC43 3CL protease and the  
483 potential of ML188 as a broad-spectrum lead compound: Homology modelling and molecular  
484 dynamic studies. *BMC Struct. Biol.* **15**, (2015).
- 485 7. Blanco, R., Carrasco, L. & Ventoso, I. Cell Killing by HIV-1 Protease. *J. Biol. Chem.* **278**, 1086–  
486 1093 (2003).
- 487 8. Li, H. *et al.* Zika Virus Protease Cleavage of Host Protein Septin-2 Mediates Mitotic Defects in  
488 Neural Progenitors. *Neuron* **101**, 1089-1098.e4 (2019).
- 489 9. Chau, D. H. W. *et al.* Coxsackievirus B3 proteases 2A and 3C induce apoptotic cell death  
490 through mitochondrial injury and cleavage of eIF4GI but not DAP5/p97/NAT1. *Apoptosis* **12**,  
491 513–524 (2007).
- 492 10. M'Barek, N. B., Audoly, G., Raoult, D. & Gluschankof, P. HIV-2 Protease resistance defined in  
493 yeast cells. *Retrovirology* **3**, 58 (2006).
- 494 11. Barco, A., Feduchi, E. & Carrasco, L. Poliovirus Protease 3Cpro Kills Cells by Apoptosis.  
495 *Virology* **266**, 352–360 (2000).



- 496 12. Li, M.-L. *et al.* The 3C protease activity of enterovirus 71 induces human neural cell apoptosis.  
497 *Virology* **293**, 386–395 (2002).
- 498 13. Jin, Z. *et al.* Structure of Mpro from SARS-CoV-2 and discovery of its inhibitors. *Nature* **582**,  
499 289–293 (2020).
- 500 14. Zhu, W. *et al.* Identification of SARS-CoV-2 3CL Protease Inhibitors by a Quantitative High-  
501 throughput Screening. *bioRxiv* 2020.07.17.207019 (2020) doi:10.1101/2020.07.17.207019.
- 502 15. CDC. Information for Laboratories about Coronavirus (COVID-19). *Centers for Disease Control*  
503 *and Prevention* <https://www.cdc.gov/coronavirus/2019-ncov/lab/lab-biosafety-guidelines.html>  
504 (2020).
- 505 16. Pyrc, K. *et al.* Culturing the Unculturable: Human Coronavirus HKU1 Infects, Replicates, and  
506 Produces Progeny Virions in Human Ciliated Airway Epithelial Cell Cultures. *J. Virol.* **84**, 11255–  
507 11263 (2010).
- 508 17. Sacco, M. D. *et al.* Structure and inhibition of the SARS-CoV-2 main protease reveals strategy  
509 for developing dual inhibitors against Mpro and cathepsin L. *bioRxiv* 2020.07.27.223727 (2020)  
510 doi:10.1101/2020.07.27.223727.
- 511 18. Sies, H. & Parnham, M. J. Potential therapeutic use of ebselen for COVID-19 and other  
512 respiratory viral infections. *Free Radic. Biol. Med.* **156**, 107–112 (2020).
- 513 19. Feoktistova, M., Geserick, P. & Leverkus, M. Crystal Violet Assay for Determining Viability of  
514 Cultured Cells. *Cold Spring Harb. Protoc.* **2016**, pdb.prot087379 (2016).
- 515 20. Ma, C. *et al.* Boceprevir, GC-376, and calpain inhibitors II, XII inhibit SARS-CoV-2 viral  
516 replication by targeting the viral main protease. *Cell Res.* 1–15 (2020) doi:10.1038/s41422-020-  
517 0356-z.
- 518 21. Vuong, W. *et al.* Feline coronavirus drug inhibits the main protease of SARS-CoV-2 and blocks  
519 virus replication. *bioRxiv* 2020.05.03.073080 (2020) doi:10.1101/2020.05.03.073080.
- 520 22. Froggatt, H. M., Heaton, B. E. & Heaton, N. S. Development of a fluorescence based, high-  
521 throughput SARS-CoV-2 3CL<sup>pro</sup> reporter assay. *bioRxiv* 2020.06.24.169565 (2020)  
522 doi:10.1101/2020.06.24.169565.

- 523 23. Luan, X. *et al.* Structure Basis for Inhibition of SARS-CoV-2 by the Feline Drug GC376. *bioRxiv*  
524 2020.06.07.138677 (2020) doi:10.1101/2020.06.07.138677.
- 525 24. Iketani, S. *et al.* Lead compounds for the development of SARS-CoV-2 3CL protease inhibitors.  
526 *bioRxiv* 2020.08.03.235291 (2020) doi:10.1101/2020.08.03.235291.
- 527 25. Yang, S. *et al.* Synthesis, Crystal Structure, Structure–Activity Relationships, and Antiviral  
528 Activity of a Potent SARS Coronavirus 3CL Protease Inhibitor. *J. Med. Chem.* **49**, 4971–4980  
529 (2006).
- 530 26. Dai, W. *et al.* Structure-based design of antiviral drug candidates targeting the SARS-CoV-2  
531 main protease. *Science* **368**, 1331–1335 (2020).
- 532 27. Ghosh, A. K. *et al.* Design, synthesis and antiviral efficacy of a series of potent chloropyridyl  
533 ester-derived SARS-CoV 3CLpro inhibitors. *Bioorg. Med. Chem. Lett.* **18**, 5684–5688 (2008).
- 534 28. Węglarz-Tomczak, E., Tomczak, J. M., Talma, M. & Brul, S. Ebselen as a highly active inhibitor  
535 of PL<sup>Pro</sup>CoV2. *bioRxiv* 2020.05.17.100768 (2020) doi:10.1101/2020.05.17.100768.
- 536 29. Seale, L. A., Torres, D. J., Berry, M. J. & Pitts, M. W. A role for selenium-dependent GPX1 in  
537 SARS-CoV-2 virulence. *Am. J. Clin. Nutr.* doi:10.1093/ajcn/nqaa177.
- 538 30. Kim, Y. *et al.* Reversal of the Progression of Fatal Coronavirus Infection in Cats by a Broad-  
539 Spectrum Coronavirus Protease Inhibitor. *PLOS Pathog.* **12**, e1005531 (2016).
- 540 31. Zhang, J.-H., Chung, T. D. Y. & Oldenburg, K. R. A Simple Statistical Parameter for Use in  
541 Evaluation and Validation of High Throughput Screening Assays. *J. Biomol. Screen.* **4**, 67–73  
542 (1999).
- 543 32. Birmingham, A. *et al.* Statistical Methods for Analysis of High-Throughput RNA Interference  
544 Screens. *Nat. Methods* **6**, 569–575 (2009).
- 545 33. Kim, Y. *et al.* Broad-Spectrum Antivirals against 3C or 3C-Like Proteases of Picornaviruses,  
546 Noroviruses, and Coronaviruses. *J. Virol.* **86**, 11754–11762 (2012).
- 547 34. Blanchard, J. E. *et al.* High-throughput screening identifies inhibitors of the SARS coronavirus  
548 main proteinase. *Chem. Biol.* **11**, 1445–1453 (2004).

- 549 35. Klotz, L. C. & Sylvester, E. J. The Consequences of a Lab Escape of a Potential Pandemic  
550 Pathogen. *Front. Public Health* **2**, (2014).
- 551 36. Coelho, A. C. & García Díez, J. Biological Risks and Laboratory-Acquired Infections: A Reality  
552 That Cannot be Ignored in Health Biotechnology. *Front. Bioeng. Biotechnol.* **3**, (2015).
- 553 37. Tan, C. W. *et al.* A SARS-CoV-2 surrogate virus neutralization test based on antibody-mediated  
554 blockage of ACE2–spike protein–protein interaction. *Nat. Biotechnol.* (2020)  
555 doi:10.1038/s41587-020-0631-z.
- 556 38. Case, J. B. *et al.* Neutralizing Antibody and Soluble ACE2 Inhibition of a Replication-Competent  
557 VSV-SARS-CoV-2 and a Clinical Isolate of SARS-CoV-2. *Cell Host Microbe*  
558 doi:10.1016/j.chom.2020.06.021.
- 559 39. Dieterle, M. E. *et al.* A Replication-Competent Vesicular Stomatitis Virus for Studies of SARS-  
560 CoV-2 Spike-Mediated Cell Entry and Its Inhibition. *Cell Host Microbe*  
561 doi:10.1016/j.chom.2020.06.020.
- 562 40. Iglewicz, B. & Hoaglin, D. C. *How to detect and handle outliers*. (ASQC Quality Press, 1993).
- 563 41. Metzger, A., Melzig, L., Despotopoulou, C. & Knochel, P. Pd-Catalyzed Cross-Coupling of  
564 Functionalized Organozinc Reagents with Thiomethyl-Substituted Heterocycles. *Org. Lett.* **11**,  
565 4228–4231 (2009).
- 566 42. Zambaldo, C. *et al.* 2-Sulfonylpyridines as Tunable, Cysteine-Reactive Electrophiles. *J. Am.*  
567 *Chem. Soc.* **142**, 8972–8979 (2020).
- 568 43. Mou, K. *et al.* Novel CADD-based peptidyl vinyl ester derivatives as potential proteasome  
569 inhibitors. *Bioorg. Med. Chem. Lett.* **18**, 2198–2202 (2008).
- 570 44. Amblard, F. *et al.* Synthesis and antiviral evaluation of novel peptidomimetics as norovirus  
571 protease inhibitors. *Bioorg. Med. Chem. Lett.* **28**, 2165–2170 (2018).

572 **Fig. 1. Expression of SARS-CoV-2 3CLpro in HEK293T cells results in toxicity that can be**  
573 **rescued by GC376. a.** SARS-CoV-2 3CL toxicity is dependent on protease activity and can be  
574 visualized with crystal violet staining. **b.** Quantification of crystal violet staining in a. **c.** Treatment of  
575 SARS-CoV-2 3CLpro expressing cells with protease inhibitor GC376 results in rescue of cytotoxicity.  
576 **d.** Quantification of c. Data are shown as mean  $\pm$  s.d. for four technical replicates.

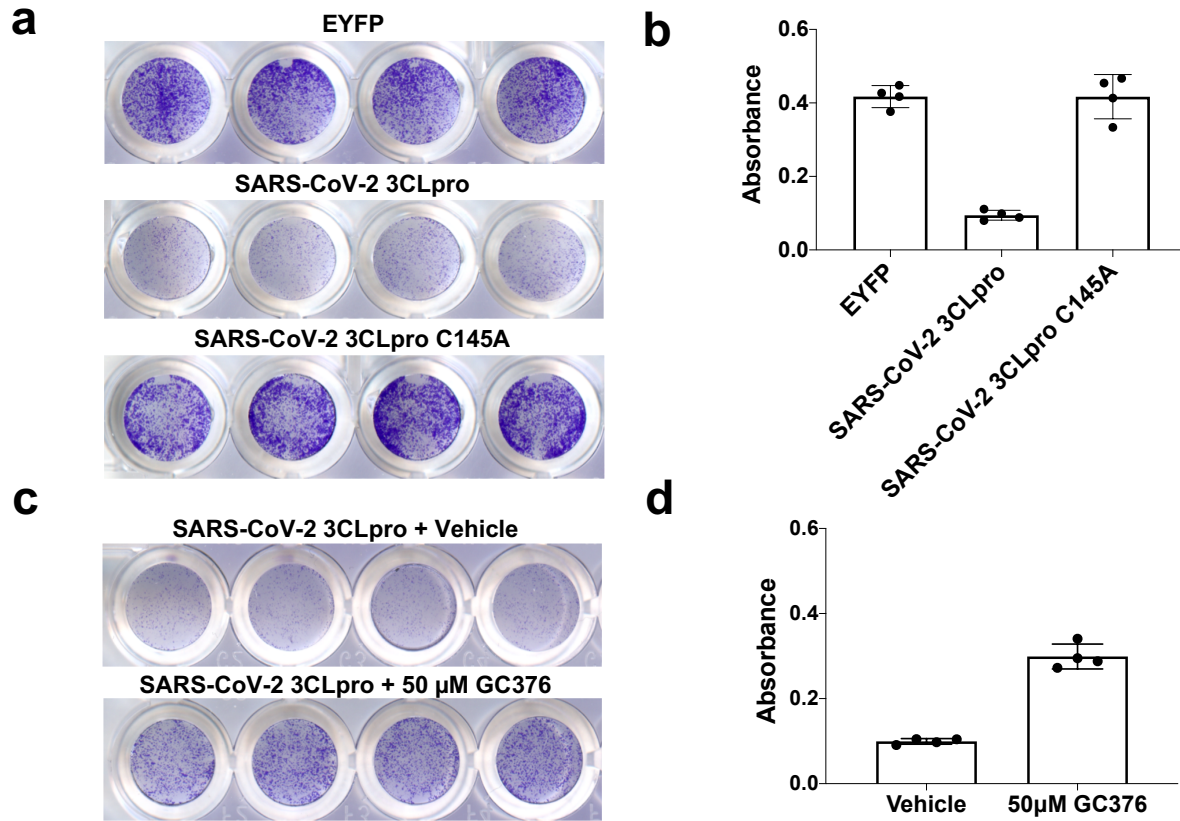

577

578 **Fig. 2. Dose response curves for SARS-CoV-2 3CLpro can be conducted with transfection-**  
579 **based assays. a-c.** SARS-CoV-2 3CLpro can be inhibited by known 3CLpro inhibitors GC376,  
580 compound 4, and 11a. The toxicity of each compound was determined by treating EYFP-transfected  
581 cells with indicated concentrations of drug and is reported as Cell Viability. **d.** Chemical structures for  
582 each of the compounds tested.  $EC_{50}$  values are displayed as best-fit value alongside 95%  
583 confidence interval.  $CC_{50}$  values are displayed as best-fit value. Data are shown as mean  $\pm$  s.d. for  
584 four technical replicates.

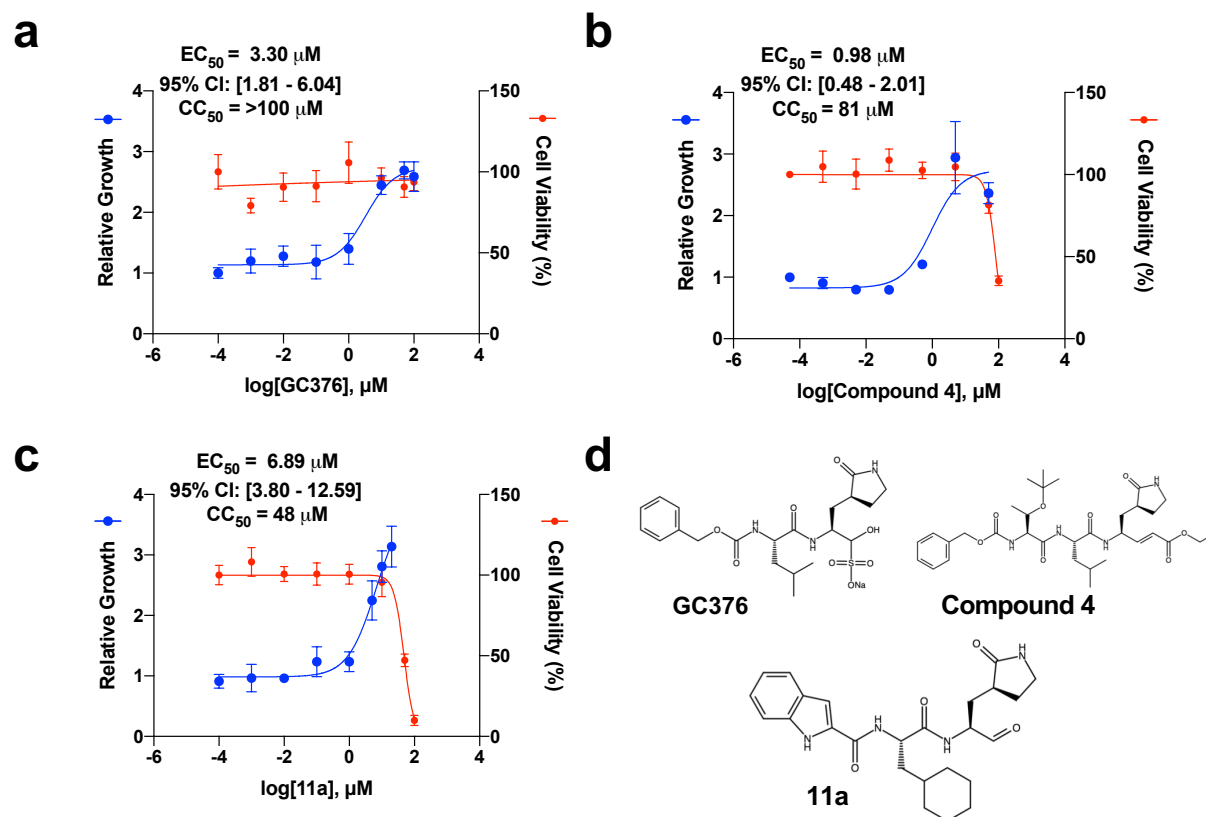

585

586 **Fig. 3. The activity of GC376, compound 4, and 11a show variable effectiveness and potency**  
587 **against the coronavirus 3CL proteases from SARS-CoV, MERS-CoV, Bat-CoV-HKU9, HCoV-**  
588 **NL63, and IBV.** EC<sub>50</sub> values are displayed as best-fit value alongside 95% confidence interval. CC<sub>50</sub>  
589 values are displayed as best-fit value. Data are shown as mean ± s.d. for three or four technical  
590 replicates.

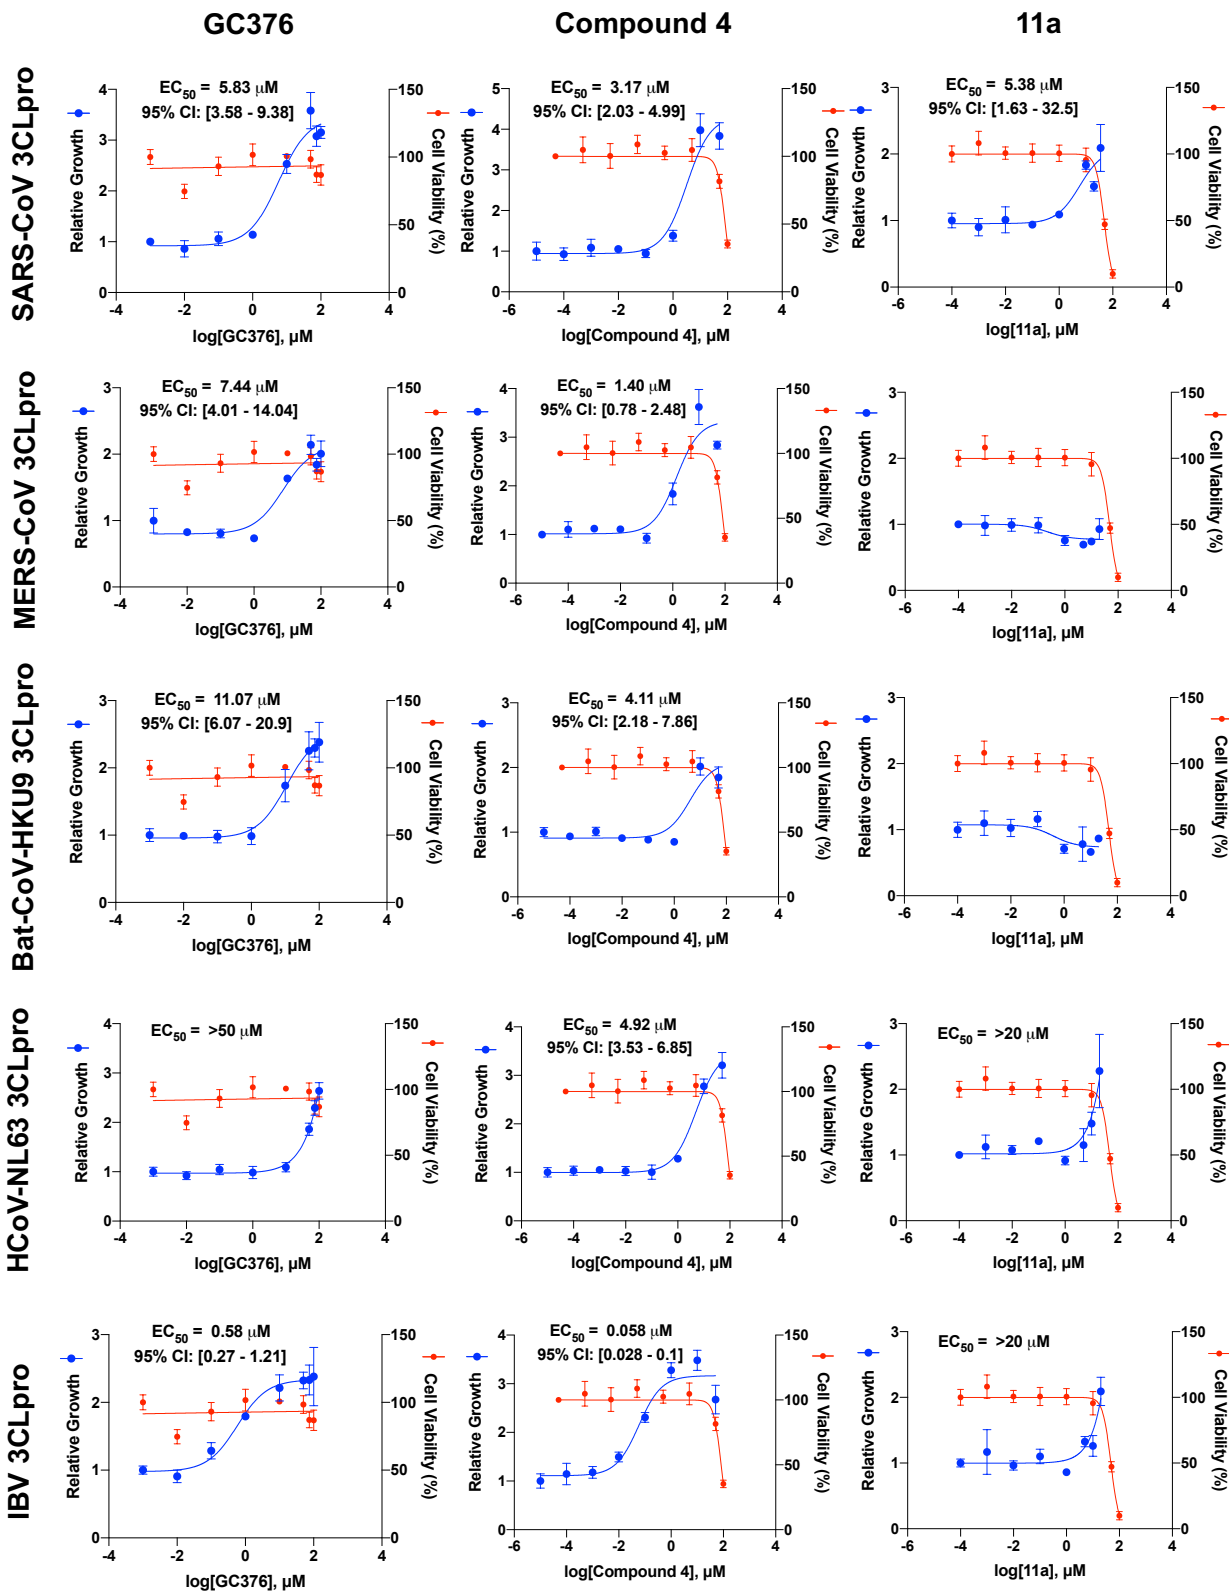

592 **Fig. 4. Small-scale drug screen and structure-activity profiling at 10  $\mu$ M identify two**  
593 **compounds, GC373 and GRL-0496, with activity against the SARS-CoV-2 3CLpro. a.**  
594 Identification of hits from the drug screen and structure-activity profiling. Positive control compounds  
595 were included in each plate and are highlighted. **b.** Compounds with structural similarity to known  
596 inhibitors. Compounds in bold are molecules that show activity against the SARS-CoV-2 3CLpro at  
597 10  $\mu$ M. **c.** Dose-response profiling and cytotoxicity determination of GRL-0496 against the SARS-  
598 CoV-2 3CLpro. **d.** Live virus testing of GRL-0496 against SARS-CoV-2.  
599  $EC_{50}$  values are displayed as best-fit value alongside 95% confidence interval. The live virus assay  
600 was conducted with two biological replicates, each with three technical replicates and the  $EC_{50}$  value  
601 was derived from all replicates.  $CC_{50}$  values are displayed as best-fit value. Data are shown as mean  
602  $\pm$  s.d. for three or four technical replicates.



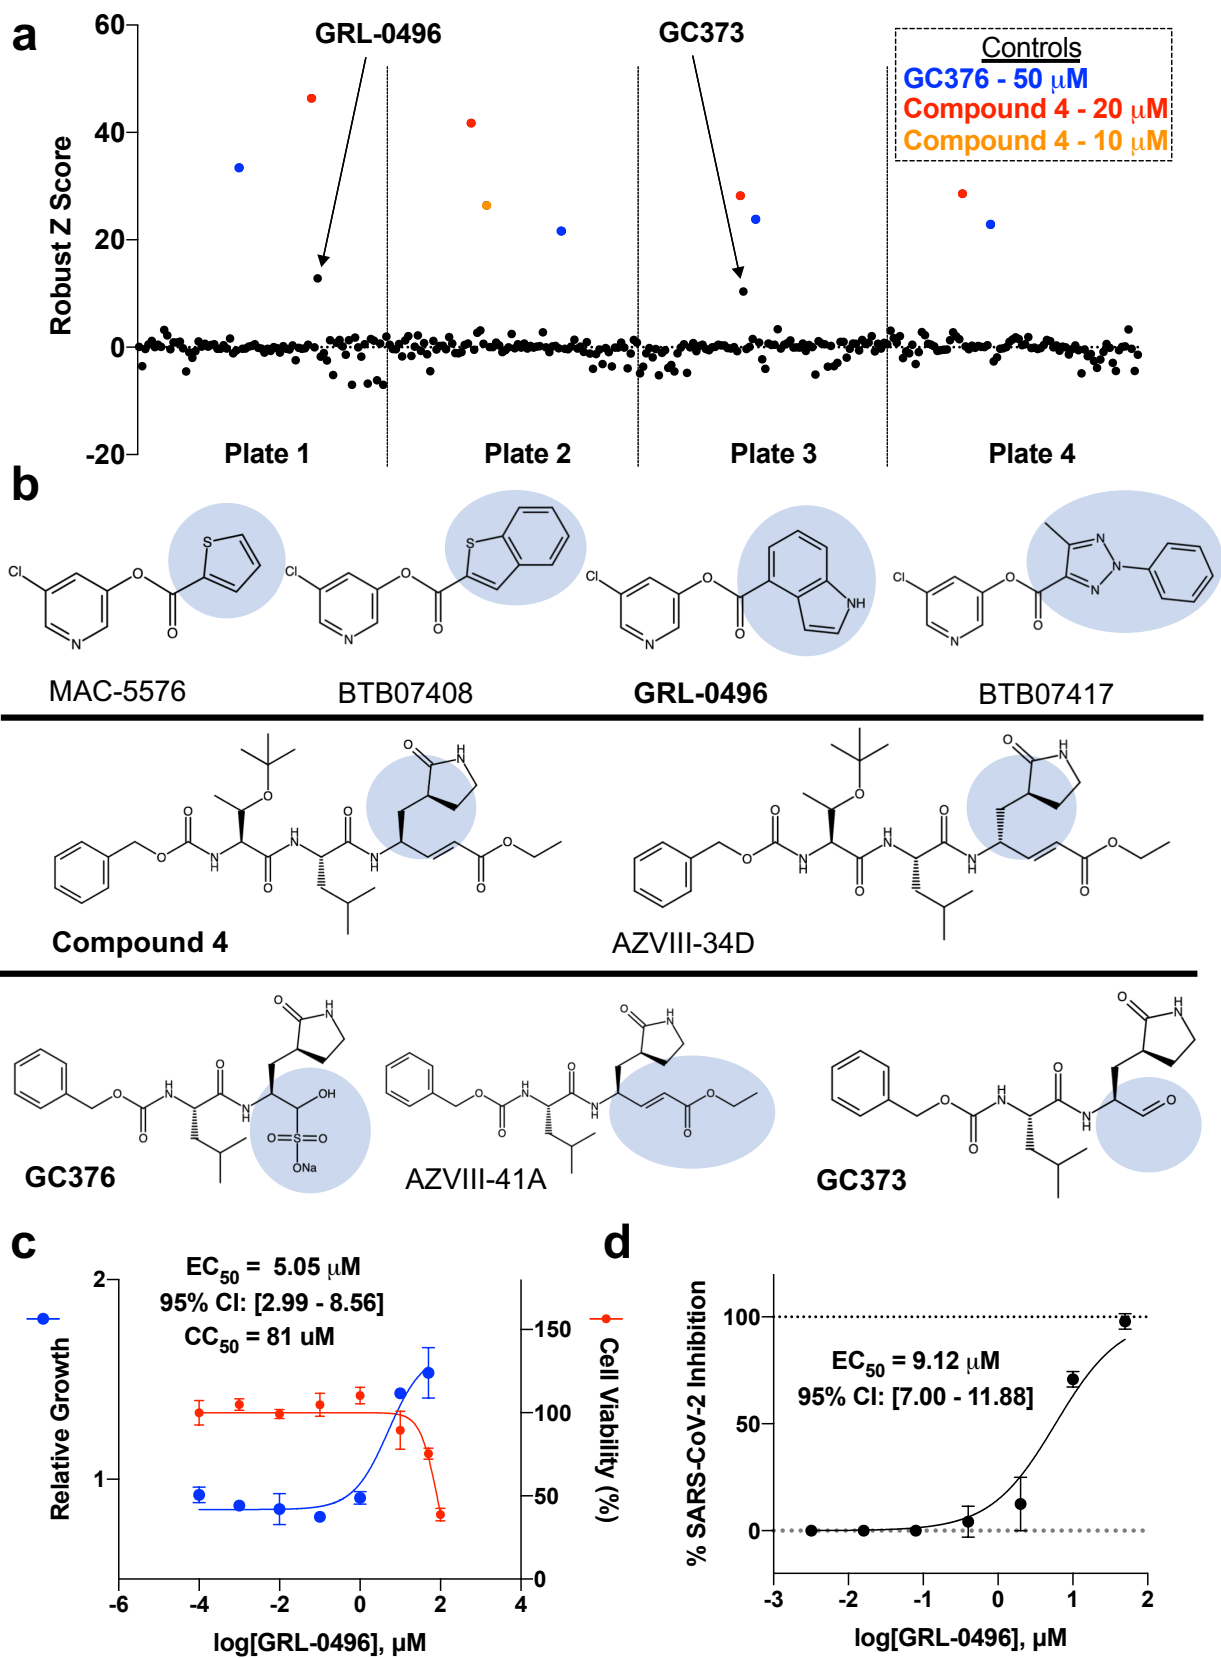

603

604 **Table 1. Comparison of literature reported live virus based EC<sub>50</sub> values compared to values**  
 605 **generated during this study.** CPE = Cytopathic effect.

| Protease             | Drug       | Calculated EC <sub>50</sub> (μM) | Literature Reported Value (μM) | Method       | Cell Line | Citation         |
|----------------------|------------|----------------------------------|--------------------------------|--------------|-----------|------------------|
| SARS-CoV-2<br>3CLpro | GC376      | 3.3                              | 3.37                           | CPE          | Vero 76   | Ma et. al.       |
|                      |            |                                  | 0.9                            | Plaque Assay | Vero E6   | Vuong et. al.    |
|                      |            |                                  | 0.18                           | qPCR         | Vero E6   | Luan et. al.     |
|                      |            |                                  | 2.2                            | qPCR         | Vero E6   | Froggatt et. al. |
|                      |            |                                  | 4.48                           | CPE          | Vero E6   | Iketani et. al.  |
| SARS-CoV-2<br>3CLpro | 11a        | 6.89                             | 2.06                           | CPE          | Vero E6   | This study       |
|                      |            |                                  | 0.53                           | Plaque Assay | Vero E6   | Dai et. al.      |
| SARS-CoV-2<br>3CLpro | Compound 4 | 0.98                             | 3.023                          | CPE          | Vero E6   | Iketani et. al.  |
| SARS-CoV-2<br>3CLpro | GRL-0496   | 5.05                             | 9.12                           | CPE          | Vero E6   | This study       |
| SARS-CoV<br>3CLpro   | GRL-0496   | 7.84                             | 6.9                            | CPE          | Vero E6   | Ghosh et. al.    |
| SARS-CoV-2<br>3CLpro | GC373      | 2.8                              | 1.5                            | Plaque Assay | Vero E6   | Vuong et. al.    |
|                      |            |                                  | 4.83                           | CPE          | Vero E6   | This Study       |

606
