# Supplementary material for: A simplified cell-based assay to identify coronavirus 3CL protease inhibitors
Source: bioRxiv or medRxiv preprint supplement (doi:10.1101/2020.08.29.272864), 2020-08-29
Supplement: Supplementary file [file media-1.pdf]

**Supplementary Fig. 1. Dose response experiments with SARS-CoV-2 3CLpro and GC376 are robust to variable assay parameters. a-d.** Repetition of assay with variable levels of cell seeding into drug conditions result in similar  $EC_{50}$  value predictions. **e-h.** Repetition of assay with variable levels of plasmid transfection results in similar  $EC_{50}$  value predictions.  $EC_{50}$  values are displayed as best-fit value alongside 95% confidence interval. Data are shown as mean  $\pm$  s.d. for four technical replicates.

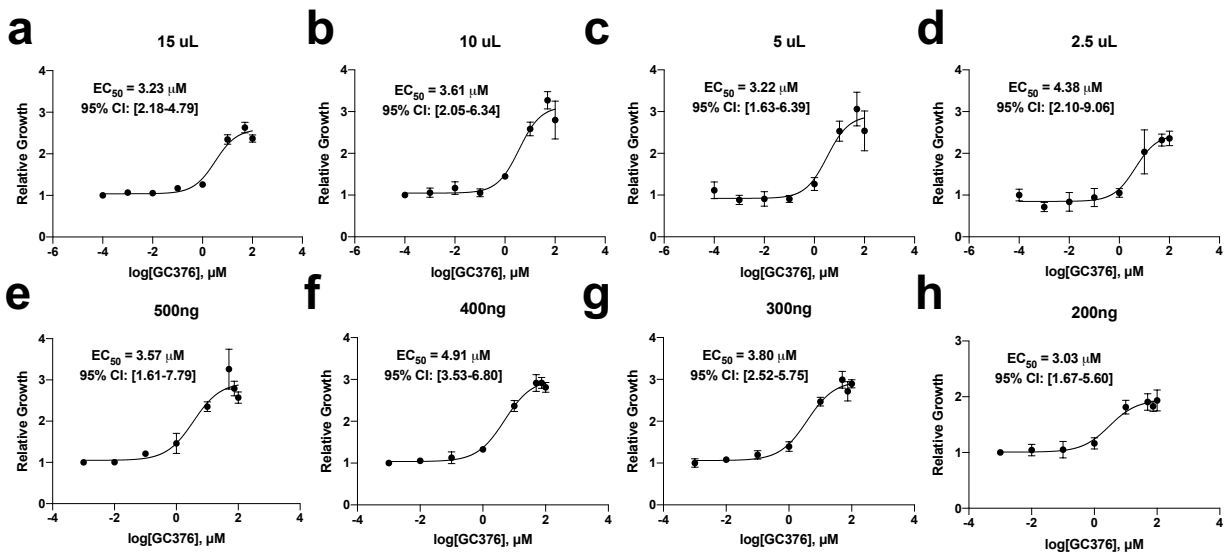

**Supplementary Fig. 2. Dose response experiments with SARS-CoV-2 3CLpro can be determined with imaging of EYFP labeled HEK293 cells. a-b.** The activity of GC376 and compound 4 can be detected using imaging rather than crystal violet staining.  $EC_{50}$  values are displayed as best-fit value alongside 95% confidence interval. Data are shown as mean  $\pm$  s.d. for four technical replicates.

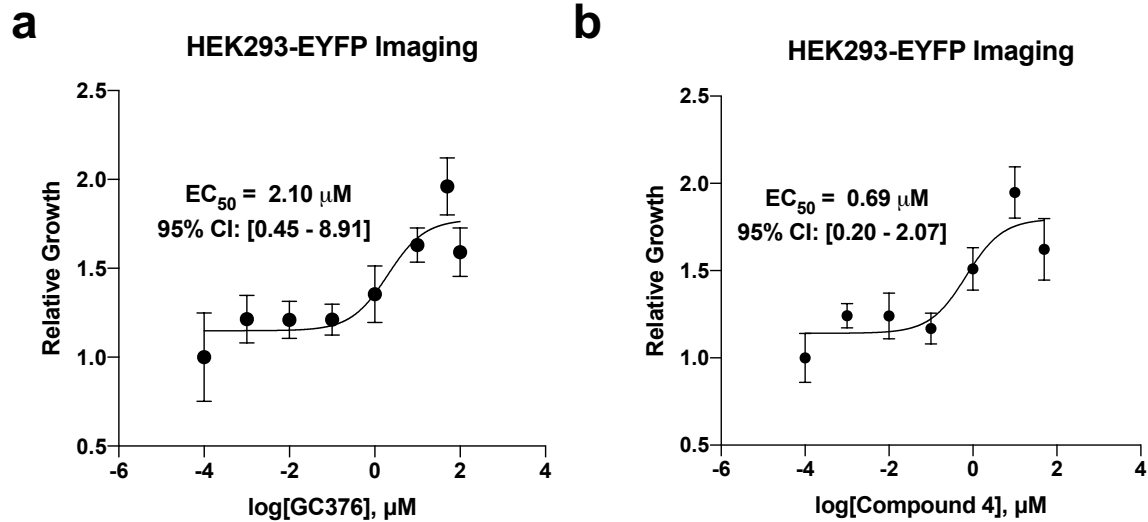

**Supplementary Figure 3. Live virus testing of compound 11a.** The  $EC_{50}$  value is displayed as best-fit value alongside 95% confidence interval. Data are shown as mean  $\pm$  s.d. for three technical replicates.

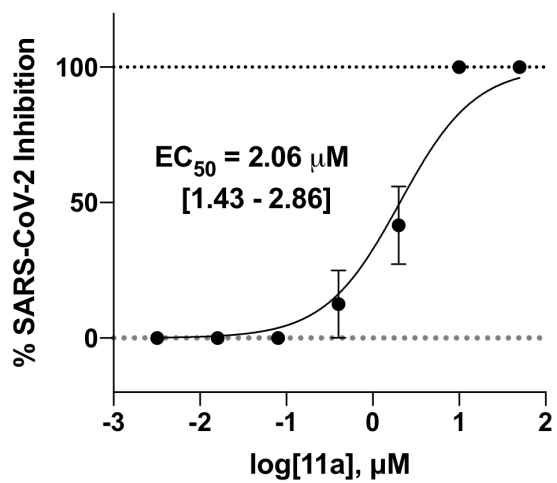

**Supplementary Fig. 4. Compounds with activity against the SARS-CoV-2 3CLpro *in vitro* that are not efficacious against the SARS-CoV-2 live virus do not show activity in the transfection-based assay. a.** DMSO was tested at concentrations up to 1%, the maximal concentration used to deliver compounds in this study, and does not show toxicity to HEK293T cells or protease inhibitory activity against the 3CLpro. **b-e.** Other compounds with reported activity against purified SARS-CoV-2 3CLpro but not against live virus. **f.** Ebselen, a compound with efficacy against the SARS-CoV-2 live virus does not rescue 3CLpro induced cytotoxicity within the transfection-based assay. EC<sub>50</sub> values are displayed as best-fit value alongside 95% confidence interval. CC<sub>50</sub> values are displayed as best-fit value. Data are shown as mean ± s.d. for three or four technical replicates.

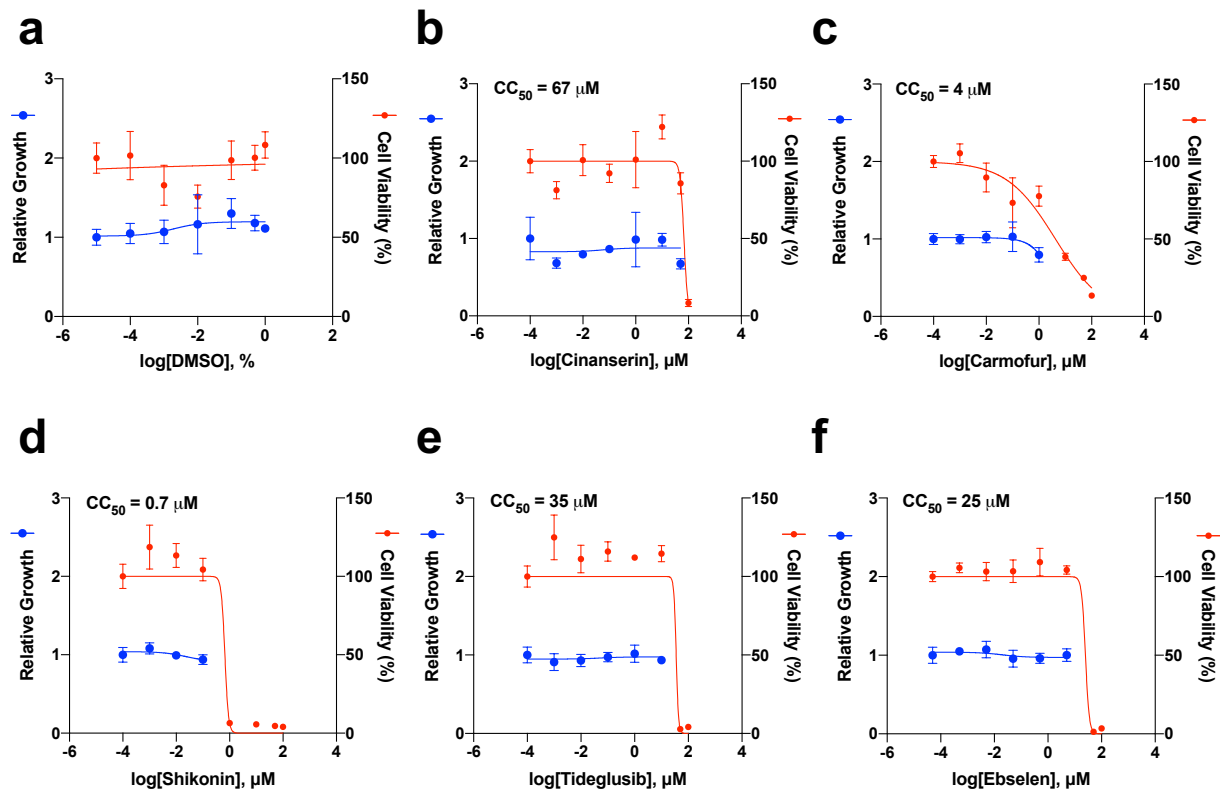

**Supplementary Fig. 5. A number of other 3CLpro enzymes from different coronavirus species also show activity-dependent cytotoxicity.** **a.** A phylogenetic tree of the six coronaviruses tested in this study, generated using NCBI Virus with the sequences of the ORF1ab polyprotein. The

genera of each virus are shown along with the amino acid sequence similarity to the SARS-CoV-2 3CLpro calculated using the Protein BLAST tool from NCBI. **b.** Quantification of cytotoxicity upon expression of active or inactivated 3CLpro enzymes from SARS-CoV, MERS-CoV, Bat-CoV-HKU9, HCoV-NL63, and IBV in 293T cells. Data are shown as mean  $\pm$  s.d. for four technical replicates.

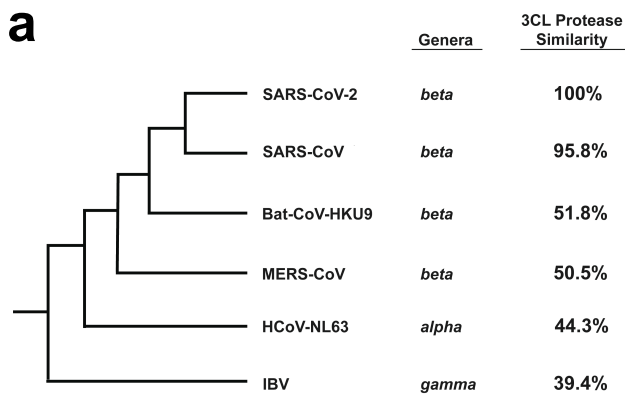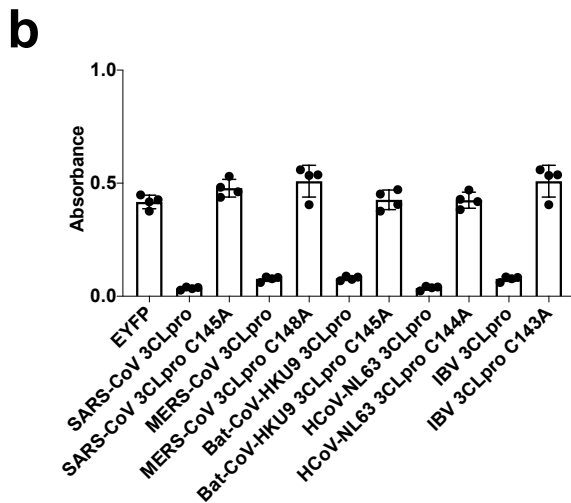

**Supplementary Fig. 6 Optimization of screening parameters and resulting Z-factors between positive and negative control wells.** Z-factor, a measure of assay quality was determined for two positive control compounds, GC376 at 50  $\mu$ M and compound 4 at 20  $\mu$ M, at different time points to identify optimal screening conditions for compounds against the SARS-CoV-2-3CLpro. The DMSO condition was conducted with 21 technical replicates randomly positioned across a 96-well plate while positive control compounds were tested at three or five technical replicates. FC = Fold Change. Data are shown as mean  $\pm$  s.d. for specified technical replicates.

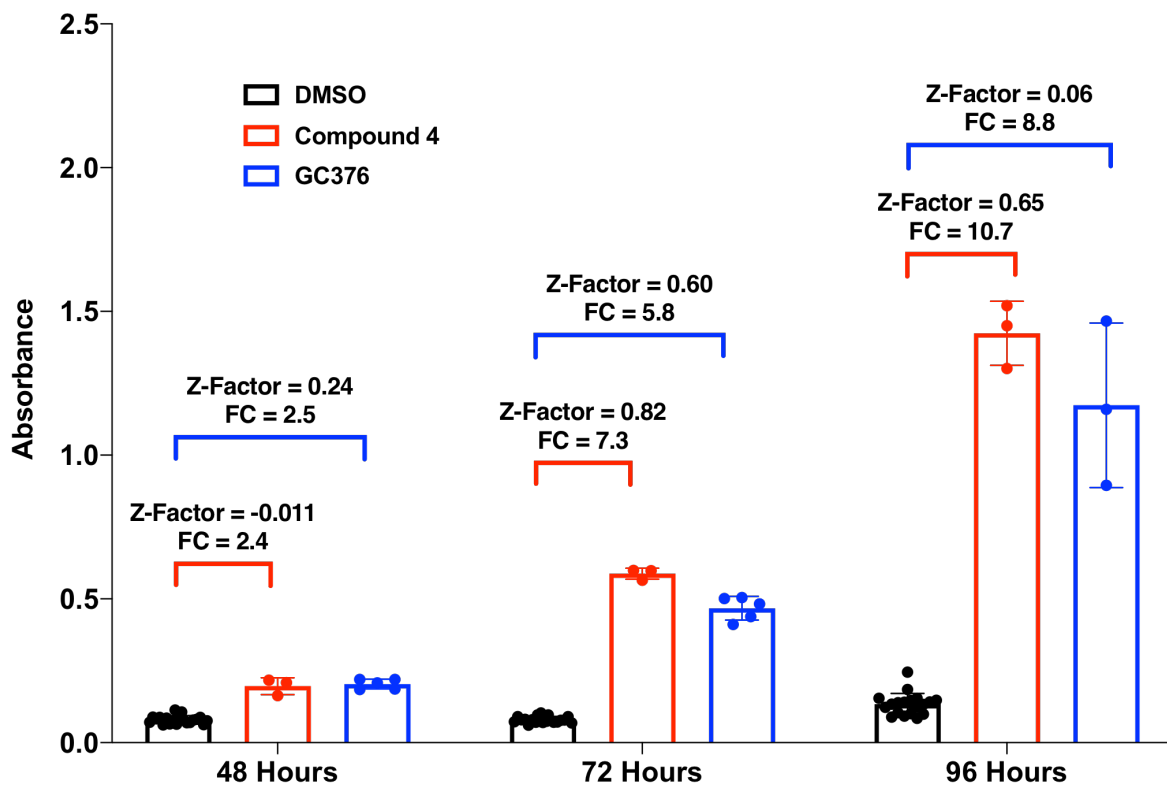

**Supplementary Fig. 7. GC373 demonstrates activity against the SARS-CoV-2 3CLpro and against the SARS-CoV-2 live virus. a.** Dose-response profiling and cytotoxicity determination using the transfection-based assay of GC373 against the SARS-CoV-2 3CLpro. **b.** Live virus testing of GC373 against SARS-CoV-2. EC<sub>50</sub> values are displayed as best-fit value alongside 95% confidence interval. The live virus assay was conducted with two biological replicates, each with three technical replicates and the EC<sub>50</sub> value was derived from all replicates. CC<sub>50</sub> values are displayed as best-fit value. Data are shown as mean ± s.d. for three or four technical replicates.

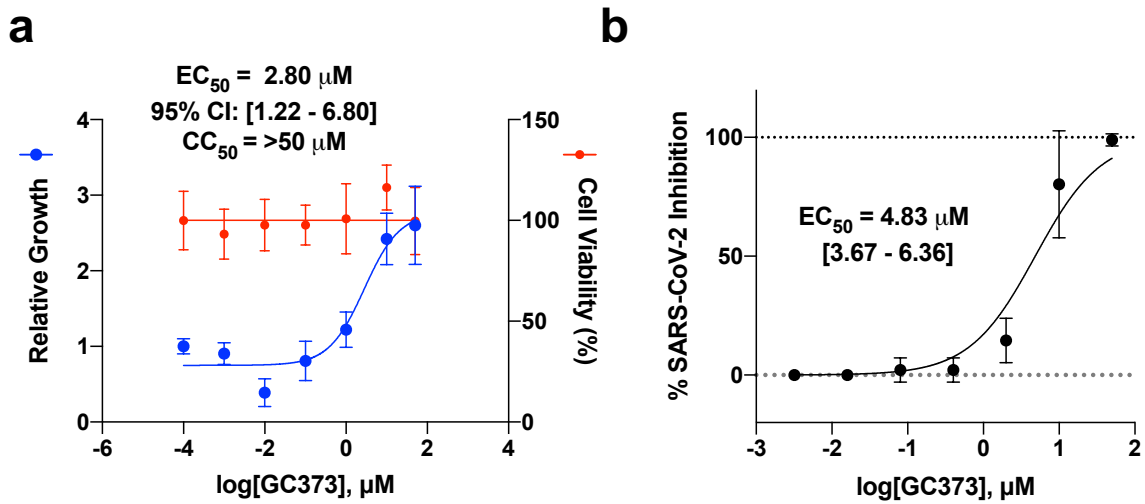

**Supplementary Fig. 8. The activity of GRL-0496 and GC373 show variable efficacy and potency against the coronavirus 3CL proteases from SARS-CoV, MERS-CoV, Bat-CoV-HKU9, HCoV-NL63, and IBV. EC<sub>50</sub> values are displayed as best-fit value alongside 95% confidence interval. CC<sub>50</sub> values are displayed as best-fit value. Data are shown as mean ± s.d. for four technical replicates.**



SARS-CoV 3CLpro

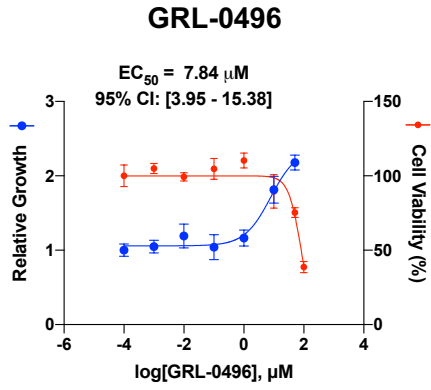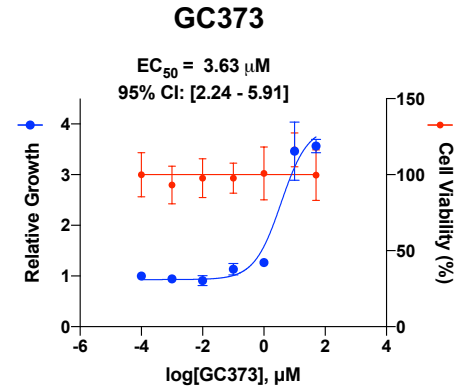

MERS-CoV 3CLpro

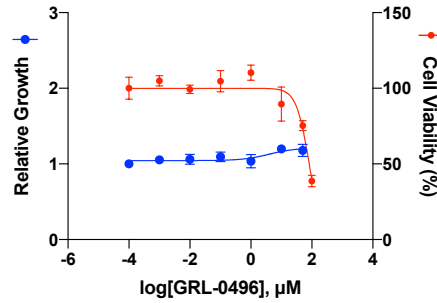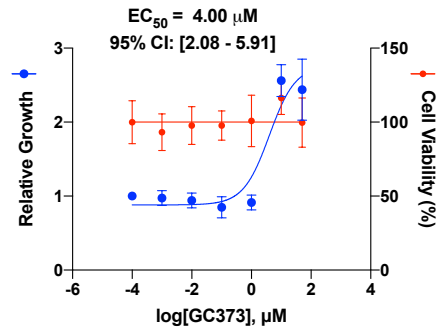

Bat-CoV-HKU9 3CLpro

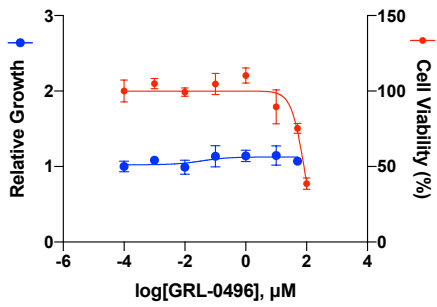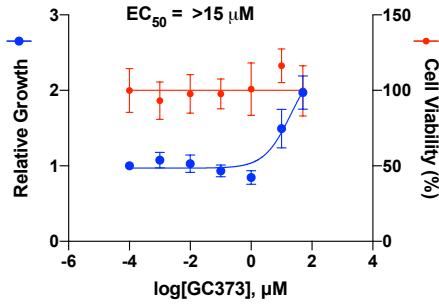

HCoV-NL63 3CLpro

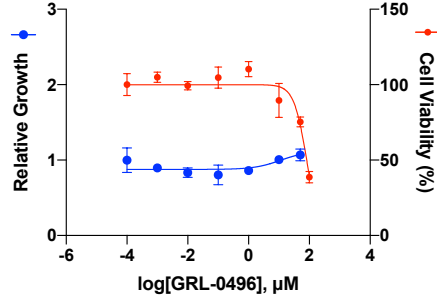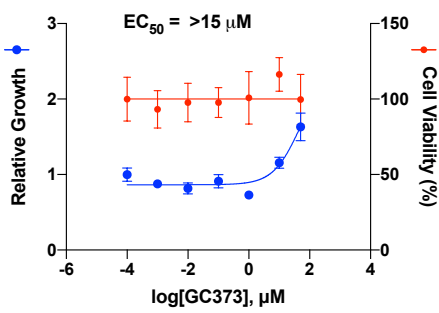

IBV 3CLpro

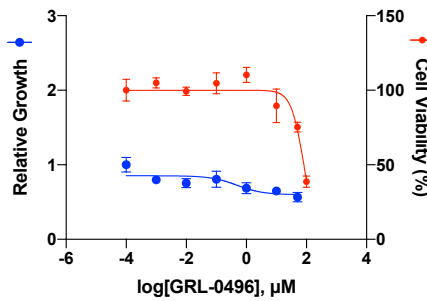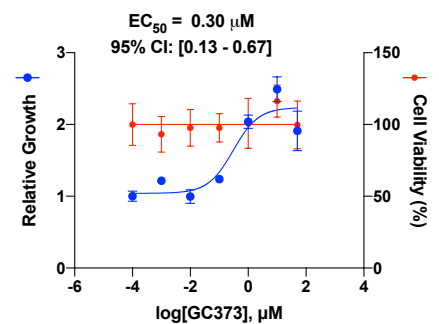

**Supplementary Table 1. Selectivity Index (SI) for compounds tested with the transfection-based assay in this study.**

| <b>Protease</b>     | <b>Drug</b> | <b>EC<sub>50</sub> (μM)</b> | <b>CC<sub>50</sub> (μM)</b> | <b>SI (CC<sub>50</sub> /EC<sub>50</sub>)</b> |
|---------------------|-------------|-----------------------------|-----------------------------|----------------------------------------------|
| SARS-CoV-2 3CLpro   | GC376       | 3.3                         | >100                        | >30.3                                        |
|                     | compound 4  | 0.98                        | 81                          | 82.7                                         |
|                     | 11a         | 6.89                        | 48                          | 7                                            |
|                     | GRL-0496    | 5.05                        | 81                          | 16                                           |
|                     | GC373       | 2.8                         | >50                         | >17.9                                        |
| SARS-CoV 3CLpro     | GC376       | 5.83                        | >100                        | >17.2                                        |
|                     | compound 4  | 3.17                        | 81                          | 25.6                                         |
|                     | 11a         | 5.38                        | 48                          | 8.9                                          |
|                     | GRL-0496    | 7.84                        | 81                          | 10.3                                         |
|                     | GC373       | 3.63                        | >50                         | >13.8                                        |
| MERS-CoV 3CLpro     | GC376       | 7.44                        | >100                        | >13.4                                        |
|                     | compound 4  | 1.4                         | 81                          | 57.9                                         |
|                     | GC373       | 4                           | >50                         | >12.5                                        |
| Bat-CoV-HKU9 3CLpro | GC376       | 11.07                       | >100                        | >9.0                                         |
|                     | compound 4  | 4.11                        | 81                          | 19.7                                         |
| HCoV-NL63 3CLpro    | compound 4  | 4.92                        | 81                          | 16.5                                         |
| IBV 3CLpro          | GC376       | 0.58                        | >100                        | >172                                         |
|                     | compound 4  | 0.058                       | 81                          | 1396.5                                       |
|                     | GC373       | 0.3                         | >50                         | >166.6                                       |

**Supplementary Table 2. Compounds screened for activity against the SARS-CoV-2 3CLpro.**

| <b>Absorbance</b> | <b>Well</b> | <b>Drug</b>                        | <b>Plate</b> | <b>Model</b>      | <b>z-score</b> |
|-------------------|-------------|------------------------------------|--------------|-------------------|----------------|
| 0.07156           | A02         | Omarigliptin                       | Plate1       | SARS-CoV-2 3CLpro | 0.07462451     |
| 0.03996           | A03         | Apoptosis Activator 2              | Plate1       | SARS-CoV-2 3CLpro | -3.5532747     |
| 0.06801           | A04         | Picolamine                         | Plate1       | SARS-CoV-2 3CLpro | -0.3329401     |
| 0.07551           | A05         | Muscone                            | Plate1       | SARS-CoV-2 3CLpro | 0.52811191     |
| 0.08101           | A06         | 2-Aminoethanethiol                 | Plate1       | SARS-CoV-2 3CLpro | 1.15955007     |
| 0.07101           | A07         | Dexibuprofen                       | Plate1       | SARS-CoV-2 3CLpro | 0.01148069     |
| 0.07496           | A08         | Glucosamine                        | Plate1       | SARS-CoV-2 3CLpro | 0.4649681      |
| 0.07141           | A09         | Gabexate mesylate                  | Plate1       | SARS-CoV-2 3CLpro | 0.05740347     |
| 0.09891           | A10         | Zalcitabine                        | Plate1       | SARS-CoV-2 3CLpro | 3.21459426     |
| 0.09016           | A11         | Amiloride hydrochloride            | Plate1       | SARS-CoV-2 3CLpro | 2.21003355     |
| 0.06776           | B02         | Saxagliptin hydrate                | Plate1       | SARS-CoV-2 3CLpro | -0.3616419     |
| 0.07901           | B03         | Linagliptin                        | Plate1       | SARS-CoV-2 3CLpro | 0.9299362      |
| 0.07831           | B04         | Sitagliptin                        | Plate1       | SARS-CoV-2 3CLpro | 0.84957134     |
| 0.08006           | B05         | Hexylresorcinol                    | Plate1       | SARS-CoV-2 3CLpro | 1.05048348     |
| 0.06906           | B06         | Arbutin                            | Plate1       | SARS-CoV-2 3CLpro | -0.2123928     |
| 0.03171           | B07         | Diminazene Aceturate               | Plate1       | SARS-CoV-2 3CLpro | -4.500432      |
| 0.06266           | B08         | 3-Pyridylacetic acid hydrochloride | Plate1       | SARS-CoV-2 3CLpro | -0.9471572     |
| 0.05386           | B09         | Racecadotril                       | Plate1       | SARS-CoV-2 3CLpro | -1.9574583     |
| 0.06456           | B10         | Mizoribine                         | Plate1       | SARS-CoV-2 3CLpro | -0.7290241     |
| 0.08056           | B11         | Sodium etidronate                  | Plate1       | SARS-CoV-2 3CLpro | 1.10788695     |
| 0.07191           | C02         | MAC-5576                           | Plate1       | SARS-CoV-2 3CLpro | 0.11480694     |
| 0.07666           | C03         | DMSO                               | Plate1       | SARS-CoV-2 3CLpro | 0.66013989     |
| 0.07206           | C04         | DMSO                               | Plate1       | SARS-CoV-2 3CLpro | 0.13202798     |
| 0.07451           | C05         | DMSO                               | Plate1       | SARS-CoV-2 3CLpro | 0.41330498     |
| 0.07591           | C06         | BTB07404                           | Plate1       | SARS-CoV-2 3CLpro | 0.57403469     |
| 0.06836           | C07         | DMSO                               | Plate1       | SARS-CoV-2 3CLpro | -0.2927577     |
| 0.06826           | C08         | DMSO                               | Plate1       | SARS-CoV-2 3CLpro | -0.3042384     |
| 0.07401           | C09         | Myrecetin                          | Plate1       | SARS-CoV-2 3CLpro | 0.35590151     |
| 0.06881           | C10         | DMSO                               | Plate1       | SARS-CoV-2 3CLpro | -0.2410946     |
| 0.08486           | C11         | Tipranavir                         | Plate1       | SARS-CoV-2 3CLpro | 1.60155678     |
| 0.06106           | D02         | DMSO                               | Plate1       | SARS-CoV-2 3CLpro | -1.1308483     |
| 0.06566           | D03         | BTB07408                           | Plate1       | SARS-CoV-2 3CLpro | -0.6027364     |
| 0.36221           | D04         | GC376                              | Plate1       | SARS-CoV-2 3CLpro | 33.443261      |
| 0.06851           | D05         | MAC-8120                           | Plate1       | SARS-CoV-2 3CLpro | -0.2755367     |
| 0.06866           | D06         | DMSO                               | Plate1       | SARS-CoV-2 3CLpro | -0.2583156     |
| 0.07186           | D07         | MWP00332                           | Plate1       | SARS-CoV-2 3CLpro | 0.10906659     |

|         |     |                      |        |                   |            |
|---------|-----|----------------------|--------|-------------------|------------|
| 0.07301 | D08 | DMSO                 | Plate1 | SARS-CoV-2 3CLpro | 0.24109457 |
| 0.07556 | D09 | DMSO                 | Plate1 | SARS-CoV-2 3CLpro | 0.53385226 |
| 0.07011 | D10 | Rupintrivir          | Plate1 | SARS-CoV-2 3CLpro | -0.0918456 |
| 0.06876 | D11 | DMSO                 | Plate1 | SARS-CoV-2 3CLpro | -0.2468349 |
| 0.06221 | E02 | DMSO                 | Plate1 | SARS-CoV-2 3CLpro | -0.9988204 |
| 0.06836 | E03 | DMSO                 | Plate1 | SARS-CoV-2 3CLpro | -0.2927577 |
| 0.06486 | E04 | BTB07417             | Plate1 | SARS-CoV-2 3CLpro | -0.694582  |
| 0.07096 | E05 | DMSO                 | Plate1 | SARS-CoV-2 3CLpro | 0.00574035 |
| 0.06971 | E06 | AZV8-49F             | Plate1 | SARS-CoV-2 3CLpro | -0.1377683 |
| 0.06231 | E07 | DMSO                 | Plate1 | SARS-CoV-2 3CLpro | -0.9873397 |
| 0.07276 | E08 | MWP00508             | Plate1 | SARS-CoV-2 3CLpro | 0.21239284 |
| 0.06846 | E09 | DMSO                 | Plate1 | SARS-CoV-2 3CLpro | -0.281277  |
| 0.06741 | E10 | DMSO                 | Plate1 | SARS-CoV-2 3CLpro | -0.4018243 |
| 0.07371 | E11 | MWP00333             | Plate1 | SARS-CoV-2 3CLpro | 0.32145943 |
| 0.04971 | F02 | Grazoprevir          | Plate1 | SARS-CoV-2 3CLpro | -2.4339071 |
| 0.06991 | F03 | AZV8-57D             | Plate1 | SARS-CoV-2 3CLpro | -0.1148069 |
| 0.06831 | F04 | DMSO                 | Plate1 | SARS-CoV-2 3CLpro | -0.298498  |
| 0.06911 | F05 | BTB07407             | Plate1 | SARS-CoV-2 3CLpro | -0.2066525 |
| 0.07516 | F06 | DMSO                 | Plate1 | SARS-CoV-2 3CLpro | 0.48792949 |
| 0.47481 | F07 | CPD18-20             | Plate1 | SARS-CoV-2 3CLpro | 46.3705222 |
| 0.07086 | F08 | DMSO                 | Plate1 | SARS-CoV-2 3CLpro | -0.0057403 |
| 0.18266 | F09 | GRL-0496             | Plate1 | SARS-CoV-2 3CLpro | 12.8296753 |
| 0.05571 | F10 | Saquinavir           | Plate1 | SARS-CoV-2 3CLpro | -1.7450655 |
| 0.06161 | F11 | DMSO                 | Plate1 | SARS-CoV-2 3CLpro | -1.0677045 |
| 0.04941 | G02 | Monobenzene          | Plate1 | SARS-CoV-2 3CLpro | -2.4683492 |
| 0.08226 | G03 | Limonin              | Plate1 | SARS-CoV-2 3CLpro | 1.30305874 |
| 0.02596 | G04 | Betulinic acid       | Plate1 | SARS-CoV-2 3CLpro | -5.1605719 |
| 0.07796 | G05 | PMSF                 | Plate1 | SARS-CoV-2 3CLpro | 0.80938891 |
| 0.08286 | G06 | Fenofibric acid      | Plate1 | SARS-CoV-2 3CLpro | 1.37194291 |
| 0.07241 | G07 | Ramelteon            | Plate1 | SARS-CoV-2 3CLpro | 0.17221041 |
| 0.05871 | G08 | Ritonavir            | Plate1 | SARS-CoV-2 3CLpro | -1.4006446 |
| 0.08216 | G09 | Alogliptin Benzoate  | Plate1 | SARS-CoV-2 3CLpro | 1.29157805 |
| 0.00986 | G10 | Bortezomib           | Plate1 | SARS-CoV-2 3CLpro | -7.0089636 |
| 0.08641 | G11 | Acetohydroxamic acid | Plate1 | SARS-CoV-2 3CLpro | 1.77950754 |
| 0.07081 | H02 | 8                    | Plate1 | SARS-CoV-2 3CLpro | -0.0114807 |
| 0.05576 | H03 | Lopinavir            | Plate1 | SARS-CoV-2 3CLpro | -1.7393251 |
| 0.07581 | H04 | Penciclovir          | Plate1 | SARS-CoV-2 3CLpro | 0.562554   |
| 0.01181 | H05 | AOB2796              | Plate1 | SARS-CoV-2 3CLpro | -6.78509   |
| 0.08421 | H06 | Maribavir            | Plate1 | SARS-CoV-2 3CLpro | 1.52693227 |

|          |     |                             |        |                   |                 |
|----------|-----|-----------------------------|--------|-------------------|-----------------|
| 0.08156  | H07 | Trelagliptin succinate      | Plate1 | SARS-CoV-2 3CLpro | 1.22269389      |
| 0.01741  | H08 | MLN9708                     | Plate1 | SARS-CoV-2 3CLpro | -6.1421712      |
| 0.07691  | H09 | SC514                       | Plate1 | SARS-CoV-2 3CLpro | 0.68884163      |
| 0.01011  | H10 | Ixazomib                    | Plate1 | SARS-CoV-2 3CLpro | -6.9802618      |
| 0.08826  | H11 | Raltegravir potassium       | Plate1 | SARS-CoV-2 3CLpro | 1.99190037      |
| 0.082225 | A02 | PSI6206                     | Plate2 | SARS-CoV-2 3CLpro | 0.48063475      |
| 0.069275 | A03 | Cilastatin                  | Plate2 | SARS-CoV-2 3CLpro | -0.3492612      |
| 0.068975 | A04 | Taxifolin                   | Plate2 | SARS-CoV-2 3CLpro | -0.3684866      |
| 0.084325 | A05 | Nafamostat mesylate         | Plate2 | SARS-CoV-2 3CLpro | 0.61521247      |
| 0.047775 | A06 | Daclatasvir dihydrochloride | Plate2 | SARS-CoV-2 3CLpro | -1.7270809      |
| 0.094525 | A07 | Darunavir†Ethanolate        | Plate2 | SARS-CoV-2 3CLpro | 1.26887573      |
| 0.106675 | A08 | Ilomastat                   | Plate2 | SARS-CoV-2 3CLpro | 2.04750402      |
| 0.049625 | A09 | Elvitegravir                | Plate2 | SARS-CoV-2 3CLpro | -1.6085243      |
| 0.076575 | A10 | Dolutegravir sodium         | Plate2 | SARS-CoV-2 3CLpro | 0.11855657      |
| 0.108725 | A11 | Astragaloside IV            | Plate2 | SARS-CoV-2 3CLpro | 2.17887751      |
| 0.064175 | B02 | Arctigenin                  | Plate2 | SARS-CoV-2 3CLpro | -0.6760929      |
| 0.086575 | B03 | Stigmasterol                | Plate2 | SARS-CoV-2 3CLpro | 0.7594029       |
| 0.054075 | B04 | Nobiletin                   | Plate2 | SARS-CoV-2 3CLpro | -1.3233477      |
| 0.005175 | B05 | Celastrol                   | Plate2 | SARS-CoV-2 3CLpro | -4.4570862      |
| 0.093275 | B06 | Glucosamine sulfate         | Plate2 | SARS-CoV-2 3CLpro | 1.18876994      |
| 0.068025 | B07 | Picoside I                  | Plate2 | SARS-CoV-2 3CLpro | -0.429367       |
| 0.078775 | B08 | Alvelestat                  | Plate2 | SARS-CoV-2 3CLpro | 0.25954276      |
| 0.079225 | B09 | N-Ethylmaleimide            | Plate2 | SARS-CoV-2 3CLpro | 0.28838085      |
| 0.068525 | B10 | DAPT                        | Plate2 | SARS-CoV-2 3CLpro | -0.3973247      |
| 0.103975 | B11 | Trelagliptin                | Plate2 | SARS-CoV-2 3CLpro | 1.87447551      |
| 0.085725 | C02 | Fosamprenavir               | Plate2 | SARS-CoV-2 3CLpro | 0.70493096      |
| 0.057525 | C03 | DMSO                        | Plate2 | SARS-CoV-2 3CLpro | -1.1022557      |
| 0.056875 | C04 | DMSO                        | Plate2 | SARS-CoV-2 3CLpro | -1.1439107      |
| 0.060275 | C05 | Indinavir                   | Plate2 | SARS-CoV-2 3CLpro | -0.9260229      |
| 0.081325 | C06 | DMSO                        | Plate2 | SARS-CoV-2 3CLpro | 0.42295858      |
| 0.085675 | C07 | DMSO                        | Plate2 | SARS-CoV-2 3CLpro | 0.70172673      |
| 0.726225 | C08 | CMPD18-20                   | Plate2 | SARS-CoV-2 3CLpro | 41.7511382      |
| 0.067575 | C09 | DMSO                        | Plate2 | SARS-CoV-2 3CLpro | -0.4582051      |
| 0.117025 | C10 | SPB08384                    | Plate2 | SARS-CoV-2 3CLpro | 2.71077996      |
| 0.123825 | C11 | DMSO                        | Plate2 | SARS-CoV-2 3CLpro | 3.14655547      |
| 0.085025 | D02 | DMSO                        | Plate2 | SARS-CoV-2 3CLpro | 0.66007172      |
| 0.486725 | D03 | CMPD18-10                   | Plate2 | SARS-CoV-2 3CLpro | 26.4028686<br>8 |
| 0.074775 | D04 | DMSO                        | Plate2 | SARS-CoV-2 3CLpro | 0.00320423      |

|          |     |                    |        |                   |            |
|----------|-----|--------------------|--------|-------------------|------------|
| 0.075325 | D05 | DMSO               | Plate2 | SARS-CoV-2 3CLpro | 0.03845078 |
| 0.088475 | D06 | Apigenin           | Plate2 | SARS-CoV-2 3CLpro | 0.8811637  |
| 0.080225 | D07 | AZVIII-57G         | Plate2 | SARS-CoV-2 3CLpro | 0.35246548 |
| 0.060775 | D08 | DMSO               | Plate2 | SARS-CoV-2 3CLpro | -0.8939806 |
| 0.066125 | D09 | SPB06613           | Plate2 | SARS-CoV-2 3CLpro | -0.5511278 |
| 0.074225 | D10 | DMSO               | Plate2 | SARS-CoV-2 3CLpro | -0.0320423 |
| 0.113225 | D11 | SPB06636           | Plate2 | SARS-CoV-2 3CLpro | 2.46725836 |
| 0.071675 | E02 | AZVIII-38          | Plate2 | SARS-CoV-2 3CLpro | -0.1954581 |
| 0.083175 | E03 | DMSO               | Plate2 | SARS-CoV-2 3CLpro | 0.54151515 |
| 0.073475 | E04 | AZVIII-49C         | Plate2 | SARS-CoV-2 3CLpro | -0.0801058 |
| 0.085225 | E05 | DMSO               | Plate2 | SARS-CoV-2 3CLpro | 0.67288864 |
| 0.070925 | E06 | Quercetin          | Plate2 | SARS-CoV-2 3CLpro | -0.2435216 |
| 0.078575 | E07 | DMSO               | Plate2 | SARS-CoV-2 3CLpro | 0.24672584 |
| 0.073625 | E08 | SPB06591           | Plate2 | SARS-CoV-2 3CLpro | -0.0704931 |
| 0.076475 | E09 | DMSO               | Plate2 | SARS-CoV-2 3CLpro | 0.11214811 |
| 0.077875 | E10 | SPB06593           | Plate2 | SARS-CoV-2 3CLpro | 0.20186659 |
| 0.117725 | E11 | DMSO               | Plate2 | SARS-CoV-2 3CLpro | 2.75563921 |
| 0.074675 | F02 | DMSO               | Plate2 | SARS-CoV-2 3CLpro | -0.0032042 |
| 0.060375 | F03 | DMSO               | Plate2 | SARS-CoV-2 3CLpro | -0.9196145 |
| 0.077325 | F04 | DMSO               | Plate2 | SARS-CoV-2 3CLpro | 0.16662005 |
| 0.078525 | F05 | Famotidine         | Plate2 | SARS-CoV-2 3CLpro | 0.2435216  |
| 0.071325 | F06 | DMSO               | Plate2 | SARS-CoV-2 3CLpro | -0.2178878 |
| 0.412325 | F07 | GC376              | Plate2 | SARS-CoV-2 3CLpro | 21.634972  |
| 0.070025 | F08 | DMSO               | Plate2 | SARS-CoV-2 3CLpro | -0.3011978 |
| 0.068675 | F09 | DMSO               | Plate2 | SARS-CoV-2 3CLpro | -0.387712  |
| 0.076275 | F10 | DMSO               | Plate2 | SARS-CoV-2 3CLpro | 0.09933118 |
| 0.096375 | F11 | DMSO               | Plate2 | SARS-CoV-2 3CLpro | 1.3874323  |
| 0.071175 | G02 | Z-VAD(OMe)-FMK     | Plate2 | SARS-CoV-2 3CLpro | -0.2275004 |
| 0.076225 | G03 | Abietic Acid       | Plate2 | SARS-CoV-2 3CLpro | 0.09612695 |
| 0.061225 | G04 | Atazanavir sulfate | Plate2 | SARS-CoV-2 3CLpro | -0.8651425 |
| 0.089475 | G05 | Abacavir           | Plate2 | SARS-CoV-2 3CLpro | 0.94524833 |
| 0.056675 | G06 | Balicatib          | Plate2 | SARS-CoV-2 3CLpro | -1.1567276 |
| 0.011625 | G07 | Carfilzomib        | Plate2 | SARS-CoV-2 3CLpro | -4.0437403 |
| 0.054975 | G08 | Atazanavir         | Plate2 | SARS-CoV-2 3CLpro | -1.2656715 |
| 0.068275 | G09 | Vildagliptin       | Plate2 | SARS-CoV-2 3CLpro | -0.4133459 |
| 0.025775 | G10 | Dapivirine         | Plate2 | SARS-CoV-2 3CLpro | -3.1369428 |
| 0.072375 | G11 | SB-3CT             | Plate2 | SARS-CoV-2 3CLpro | -0.1505989 |
| 0.060825 | H02 | PD 151746          | Plate2 | SARS-CoV-2 3CLpro | -0.8907764 |
| 0.018775 | H03 | PAC1               | Plate2 | SARS-CoV-2 3CLpro | -3.5855352 |

|          |     |                                  |        |                   |            |
|----------|-----|----------------------------------|--------|-------------------|------------|
| 0.073725 | H04 | Camostat mesilate                | Plate2 | SARS-CoV-2 3CLpro | -0.0640846 |
| 0.073525 | H05 | Efavirenz                        | Plate2 | SARS-CoV-2 3CLpro | -0.0769016 |
| 0.088325 | H06 | Des(benzylpyridyl)<br>Atazanavir | Plate2 | SARS-CoV-2 3CLpro | 0.87155101 |
| 0.073375 | H07 | LY2811376                        | Plate2 | SARS-CoV-2 3CLpro | -0.0865143 |
| 0.013175 | H08 | FLI06                            | Plate2 | SARS-CoV-2 3CLpro | -3.9444091 |
| 0.056425 | H09 | SRPIN340                         | Plate2 | SARS-CoV-2 3CLpro | -1.1727488 |
| 0.096125 | H10 | NSC 405020                       | Plate2 | SARS-CoV-2 3CLpro | 1.37141114 |
| 0.088525 | H11 | Leupeptin Hemisulfate            | Plate2 | SARS-CoV-2 3CLpro | 0.88436793 |
| 0.01024  | A02 | Epoxomicin                       | Plate3 | SARS-CoV-2 3CLpro | -4.8596643 |
| 0.02879  | A03 | MG101                            | Plate3 | SARS-CoV-2 3CLpro | -3.6239306 |
| 0.06649  | A04 | lavendustin C                    | Plate3 | SARS-CoV-2 3CLpro | -1.1124934 |
| 0.08099  | A05 | BMS707035                        | Plate3 | SARS-CoV-2 3CLpro | -0.146556  |
| 0.05509  | A06 | Asunaprevir                      | Plate3 | SARS-CoV-2 3CLpro | -1.87192   |
| 0.07839  | A07 | Loxistatin Acid                  | Plate3 | SARS-CoV-2 3CLpro | -0.3197586 |
| 0.00484  | A08 | GK921                            | Plate3 | SARS-CoV-2 3CLpro | -5.2193927 |
| 0.06729  | A09 | L-685,458                        | Plate3 | SARS-CoV-2 3CLpro | -1.0592003 |
| 0.07469  | A10 | Tenofovir Disoproxil<br>Fumarate | Plate3 | SARS-CoV-2 3CLpro | -0.5662392 |
| 0.02539  | A11 | GSK690693                        | Plate3 | SARS-CoV-2 3CLpro | -3.8504263 |
| 0.03379  | B02 | Ledipasvir                       | Plate3 | SARS-CoV-2 3CLpro | -3.2908487 |
| 0.01554  | B03 | ONX0914                          | Plate3 | SARS-CoV-2 3CLpro | -4.5065975 |
| 0.06614  | B04 | PI1840                           | Plate3 | SARS-CoV-2 3CLpro | -1.1358091 |
| 0.08239  | B05 | (+)-Isocorydine<br>hydrochloride | Plate3 | SARS-CoV-2 3CLpro | -0.0532931 |
| 0.09179  | B06 | UAMC 00039<br>dihydrochloride    | Plate3 | SARS-CoV-2 3CLpro | 0.57290079 |
| 0.01119  | B07 | PE859                            | Plate3 | SARS-CoV-2 3CLpro | -4.7963787 |
| 0.08269  | B08 | RO4929097                        | Plate3 | SARS-CoV-2 3CLpro | -0.0333082 |
| 0.09519  | B09 | Emricasan                        | Plate3 | SARS-CoV-2 3CLpro | 0.79939646 |
| 0.07204  | B10 | CGS 27023A                       | Plate3 | SARS-CoV-2 3CLpro | -0.7427725 |
| 0.08719  | B11 | Talabostat mesylate              | Plate3 | SARS-CoV-2 3CLpro | 0.26646549 |
| 0.09014  | C02 | AZVIII-33B                       | Plate3 | SARS-CoV-2 3CLpro | 0.46298378 |
| 0.07829  | C03 | DMSO                             | Plate3 | SARS-CoV-2 3CLpro | -0.3264202 |
| 0.07454  | C04 | MDL28170                         | Plate3 | SARS-CoV-2 3CLpro | -0.5762316 |
| 0.08274  | C05 | DMSO                             | Plate3 | SARS-CoV-2 3CLpro | -0.0299774 |
| 0.08389  | C06 | DMSO                             | Plate3 | SARS-CoV-2 3CLpro | 0.04663146 |
| 0.09039  | C07 | AZVIII-44H                       | Plate3 | SARS-CoV-2 3CLpro | 0.47963787 |
| 0.08804  | C08 | DMSO                             | Plate3 | SARS-CoV-2 3CLpro | 0.3230894  |
| 0.08794  | C09 | DMSO                             | Plate3 | SARS-CoV-2 3CLpro | 0.31642776 |
| 0.08059  | C10 | DMSO                             | Plate3 | SARS-CoV-2 3CLpro | -0.1732026 |

|         |     |                    |        |                   |            |
|---------|-----|--------------------|--------|-------------------|------------|
| 0.07924 | C11 | DMSO               | Plate3 | SARS-CoV-2 3CLpro | -0.2631347 |
| 0.08329 | D02 | DMSO               | Plate3 | SARS-CoV-2 3CLpro | 0.00666164 |
| 0.07209 | D03 | Bicailein          | Plate3 | SARS-CoV-2 3CLpro | -0.7394417 |
| 0.50684 | D04 | CMPD18-20          | Plate3 | SARS-CoV-2 3CLpro | 28.2220257 |
| 0.23874 | D05 | GC373              | Plate3 | SARS-CoV-2 3CLpro | 10.3621766 |
| 0.07824 | D06 | DMSO               | Plate3 | SARS-CoV-2 3CLpro | -0.329751  |
| 0.08409 | D07 | DMSO               | Plate3 | SARS-CoV-2 3CLpro | 0.05995473 |
| 0.10644 | D08 | AZVIII-41A         | Plate3 | SARS-CoV-2 3CLpro | 1.54883063 |
| 0.44099 | D09 | GC376              | Plate3 | SARS-CoV-2 3CLpro | 23.8353377 |
| 0.09614 | D10 | DMSO               | Plate3 | SARS-CoV-2 3CLpro | 0.86268201 |
| 0.04954 | D11 | MWP00709           | Plate3 | SARS-CoV-2 3CLpro | -2.2416409 |
| 0.02289 | E02 | NT 1-32            | Plate3 | SARS-CoV-2 3CLpro | -4.0169672 |
| 0.09329 | E03 | DMSO               | Plate3 | SARS-CoV-2 3CLpro | 0.67282535 |
| 0.08949 | E04 | GRL0617            | Plate3 | SARS-CoV-2 3CLpro | 0.41968314 |
| 0.09009 | E05 | DMSO               | Plate3 | SARS-CoV-2 3CLpro | 0.45965296 |
| 0.13364 | E06 | AZVIII-34D         | Plate3 | SARS-CoV-2 3CLpro | 3.36079593 |
| 0.07969 | E07 | DMSO               | Plate3 | SARS-CoV-2 3CLpro | -0.2331573 |
| 0.08989 | E08 | DMSO               | Plate3 | SARS-CoV-2 3CLpro | 0.44632969 |
| 0.09419 | E09 | DMSO               | Plate3 | SARS-CoV-2 3CLpro | 0.73278008 |
| 0.10229 | E10 | AZVIII-30          | Plate3 | SARS-CoV-2 3CLpro | 1.27237269 |
| 0.08209 | E11 | DMSO               | Plate3 | SARS-CoV-2 3CLpro | -0.073278  |
| 0.08309 | F02 | DMSO               | Plate3 | SARS-CoV-2 3CLpro | -0.0066616 |
| 0.08234 | F03 | AZVIII-37A         | Plate3 | SARS-CoV-2 3CLpro | -0.0566239 |
| 0.09354 | F04 | DMSO               | Plate3 | SARS-CoV-2 3CLpro | 0.68947944 |
| 0.07304 | F05 | Betrixaban         | Plate3 | SARS-CoV-2 3CLpro | -0.6761562 |
| 0.08944 | F06 | DMSO               | Plate3 | SARS-CoV-2 3CLpro | 0.41635232 |
| 0.08344 | F07 | AZVIII-43A         | Plate3 | SARS-CoV-2 3CLpro | 0.01665409 |
| 0.00659 | F08 | MAC22272           | Plate3 | SARS-CoV-2 3CLpro | -5.102814  |
| 0.10049 | F09 | Amentoflavone      | Plate3 | SARS-CoV-2 3CLpro | 1.15246322 |
| 0.09359 | F10 | DMSO               | Plate3 | SARS-CoV-2 3CLpro | 0.69281026 |
| 0.09164 | F11 | DMSO               | Plate3 | SARS-CoV-2 3CLpro | 0.56290834 |
| 0.02859 | G02 | Ledipasvir acetone | Plate3 | SARS-CoV-2 3CLpro | -3.6372539 |
| 0.08679 | G03 | Batimastat         | Plate3 | SARS-CoV-2 3CLpro | 0.23981894 |
| 0.03034 | G04 | TOFA               | Plate3 | SARS-CoV-2 3CLpro | -3.5206752 |
| 0.03934 | G05 | HZ1157             | Plate3 | SARS-CoV-2 3CLpro | -2.9211279 |
| 0.09814 | G06 | Abacavir sulfate   | Plate3 | SARS-CoV-2 3CLpro | 0.99591475 |
| 0.09834 | G07 | Sivelestat         | Plate3 | SARS-CoV-2 3CLpro | 1.00923803 |
| 0.05434 | G08 | Dasabuvir          | Plate3 | SARS-CoV-2 3CLpro | -1.9218823 |
| 0.07869 | G09 | Calycosin          | Plate3 | SARS-CoV-2 3CLpro | -0.2997737 |



|         |     |                           |        |                   |            |
|---------|-----|---------------------------|--------|-------------------|------------|
| 0.09329 | G10 | 4-Methoxysalicylaldehyde  | Plate3 | SARS-CoV-2 3CLpro | 0.67282535 |
| 0.09294 | G11 | Sebacic acid              | Plate3 | SARS-CoV-2 3CLpro | 0.64950962 |
| 0.07394 | H02 | Deoxyarbutin              | Plate3 | SARS-CoV-2 3CLpro | -0.6162014 |
| 0.10384 | H03 | 2-5-dihydroxyacetophenone | Plate3 | SARS-CoV-2 3CLpro | 1.37562807 |
| 0.09194 | H04 | Oxyresveratrol            | Plate3 | SARS-CoV-2 3CLpro | 0.58289325 |
| 0.09649 | H05 | Aloxistatin               | Plate3 | SARS-CoV-2 3CLpro | 0.88599774 |
| 0.11434 | H06 | Fostemsavir               | Plate3 | SARS-CoV-2 3CLpro | 2.07509997 |
| 0.07149 | H07 | Tasisulam                 | Plate3 | SARS-CoV-2 3CLpro | -0.7794115 |
| 0.09304 | H08 | Semagacestat              | Plate3 | SARS-CoV-2 3CLpro | 0.65617126 |
| 0.07974 | H09 | Triciribine               | Plate3 | SARS-CoV-2 3CLpro | -0.2298265 |
| 0.09534 | H10 | IMR-1A                    | Plate3 | SARS-CoV-2 3CLpro | 0.80938891 |
| 0.09124 | H11 | IMR1                      | Plate3 | SARS-CoV-2 3CLpro | 0.53626179 |
| 0.12075 | A02 | Z-IETD-FMK                | Plate4 | SARS-CoV-2 3CLpro | 3.10166071 |
| 0.1     | A03 | VR23                      | Plate4 | SARS-CoV-2 3CLpro | 1.72277566 |
| 0.08645 | A04 | Amprenavir                | Plate4 | SARS-CoV-2 3CLpro | 0.82234711 |
| 0.10545 | A05 | AA26-9                    | Plate4 | SARS-CoV-2 3CLpro | 2.08494065 |
| 0.04395 | A06 | Dolutegravir              | Plate4 | SARS-CoV-2 3CLpro | -2.0018753 |
| 0.0624  | A07 | Lomibuvir                 | Plate4 | SARS-CoV-2 3CLpro | -0.7758305 |
| 0.05675 | A08 | Ginsenoside Rh2           | Plate4 | SARS-CoV-2 3CLpro | -1.151286  |
| 0.08095 | A09 | UK371804                  | Plate4 | SARS-CoV-2 3CLpro | 0.45685951 |
| 0.02685 | A10 | CA-074 methyl ester       | Plate4 | SARS-CoV-2 3CLpro | -3.1382095 |
| 0.0603  | A11 | ML281                     | Plate4 | SARS-CoV-2 3CLpro | -0.9153803 |
| 0.1165  | B02 | CP 640186                 | Plate4 | SARS-CoV-2 3CLpro | 2.81923847 |
| 0.10795 | B03 | Hydroumbellic acid        | Plate4 | SARS-CoV-2 3CLpro | 2.25107138 |
| 0.084   | B04 | Ethyl gallate             | Plate4 | SARS-CoV-2 3CLpro | 0.65953899 |
| 0.0811  | B05 | Senegenin                 | Plate4 | SARS-CoV-2 3CLpro | 0.46682735 |
| 0.0767  | B06 | lithospermic acid         | Plate4 | SARS-CoV-2 3CLpro | 0.17443727 |
| 0.0637  | B07 | Dibenzazepine             | Plate4 | SARS-CoV-2 3CLpro | -0.6894425 |
| 0.0658  | B08 | LY411575                  | Plate4 | SARS-CoV-2 3CLpro | -0.5498927 |
| 0.0668  | B09 | Paritaprevir              | Plate4 | SARS-CoV-2 3CLpro | -0.4834404 |
| 0.06765 | B10 | Sofosbuvir                | Plate4 | SARS-CoV-2 3CLpro | -0.426956  |
| 0.0935  | B11 | Crenigacestat             | Plate4 | SARS-CoV-2 3CLpro | 1.29083576 |
| 0.11605 | C02 | Avagacestat               | Plate4 | SARS-CoV-2 3CLpro | 2.78933494 |
| 0.1044  | C03 | Stearic acid              | Plate4 | SARS-CoV-2 3CLpro | 2.01516574 |
| 0.09655 | C04 | DMSO                      | Plate4 | SARS-CoV-2 3CLpro | 1.49351525 |
| 0.5042  | C05 | CMPD18-20                 | Plate4 | SARS-CoV-2 3CLpro | 28.5827919 |
| 0.0761  | C06 | DMSO                      | Plate4 | SARS-CoV-2 3CLpro | 0.13456589 |

|         |     |                       |        |                   |            |
|---------|-----|-----------------------|--------|-------------------|------------|
| 0.0685  | C07 | AZVIII-42             | Plate4 | SARS-CoV-2 3CLpro | -0.3704715 |
| 0.0781  | C08 | DMSO                  | Plate4 | SARS-CoV-2 3CLpro | 0.26747047 |
| 0.07245 | C09 | DMSO                  | Plate4 | SARS-CoV-2 3CLpro | -0.107985  |
| 0.07745 | C10 | CC42746               | Plate4 | SARS-CoV-2 3CLpro | 0.22427648 |
| 0.07475 | C11 | DMSO                  | Plate4 | SARS-CoV-2 3CLpro | 0.0448553  |
| 0.07445 | D02 | DMSO                  | Plate4 | SARS-CoV-2 3CLpro | 0.02491961 |
| 0.07965 | D03 | BTB07789              | Plate4 | SARS-CoV-2 3CLpro | 0.37047153 |
| 0.41755 | D04 | GC376                 | Plate4 | SARS-CoV-2 3CLpro | 22.8247009 |
| 0.0346  | D05 | AZVIII-40A            | Plate4 | SARS-CoV-2 3CLpro | -2.6232042 |
| 0.04545 | D06 | BTB07420              | Plate4 | SARS-CoV-2 3CLpro | -1.9021968 |
| 0.06985 | D07 | DMSO                  | Plate4 | SARS-CoV-2 3CLpro | -0.2807609 |
| 0.07115 | D08 | DMSO                  | Plate4 | SARS-CoV-2 3CLpro | -0.194373  |
| 0.0744  | D09 | AZVIII-44E            | Plate4 | SARS-CoV-2 3CLpro | 0.021597   |
| 0.0888  | D10 | DMSO                  | Plate4 | SARS-CoV-2 3CLpro | 0.97850999 |
| 0.0955  | D11 | MWP00710              | Plate4 | SARS-CoV-2 3CLpro | 1.42374035 |
| 0.1017  | E02 | BTB07421              | Plate4 | SARS-CoV-2 3CLpro | 1.83574456 |
| 0.09715 | E03 | DMSO                  | Plate4 | SARS-CoV-2 3CLpro | 1.53338663 |
| 0.0795  | E04 | MAC-30731             | Plate4 | SARS-CoV-2 3CLpro | 0.36050368 |
| 0.08255 | E05 | DMSO                  | Plate4 | SARS-CoV-2 3CLpro | 0.56318317 |
| 0.1028  | E06 | NT 1-24               | Plate4 | SARS-CoV-2 3CLpro | 1.90884208 |
| 0.0716  | E07 | DMSO                  | Plate4 | SARS-CoV-2 3CLpro | -0.1644694 |
| 0.07325 | E08 | AZVIII-44D            | Plate4 | SARS-CoV-2 3CLpro | -0.0548231 |
| 0.0693  | E09 | DMSO                  | Plate4 | SARS-CoV-2 3CLpro | -0.3173097 |
| 0.07195 | E10 | DMSO                  | Plate4 | SARS-CoV-2 3CLpro | -0.1412111 |
| 0.0803  | E11 | DMSO                  | Plate4 | SARS-CoV-2 3CLpro | 0.41366552 |
| 0.0946  | F02 | DMSO                  | Plate4 | SARS-CoV-2 3CLpro | 1.36393329 |
| 0.09095 | F03 | AZVIII-44B            | Plate4 | SARS-CoV-2 3CLpro | 1.12138242 |
| 0.07375 | F04 | DMSO                  | Plate4 | SARS-CoV-2 3CLpro | -0.021597  |
| 0.0791  | F05 | NT 1-21               | Plate4 | SARS-CoV-2 3CLpro | 0.33392277 |
| 0.0642  | F06 | DMSO                  | Plate4 | SARS-CoV-2 3CLpro | -0.6562164 |
| 0.076   | F07 | SCR00533              | Plate4 | SARS-CoV-2 3CLpro | 0.12792066 |
| 0.07345 | F08 | DMSO                  | Plate4 | SARS-CoV-2 3CLpro | -0.0415327 |
| 0.05335 | F09 | Glecaprevir           | Plate4 | SARS-CoV-2 3CLpro | -1.3772237 |
| 0.0681  | F10 | SEW03089              | Plate4 | SARS-CoV-2 3CLpro | -0.3970524 |
| 0.07905 | F11 | DMSO                  | Plate4 | SARS-CoV-2 3CLpro | 0.33060015 |
| 0.0656  | G02 | Doravirine            | Plate4 | SARS-CoV-2 3CLpro | -0.5631832 |
| 0.0011  | G03 | Delanzomib            | Plate4 | SARS-CoV-2 3CLpro | -4.849356  |
| 0.0675  | G04 | Morrisoniside         | Plate4 | SARS-CoV-2 3CLpro | -0.4369238 |
| 0.04885 | G05 | Calycosin-7-O-beta-D- | Plate4 | SARS-CoV-2 3CLpro | -1.6762591 |

|         |     | glucoside           |        |                   |            |
|---------|-----|---------------------|--------|-------------------|------------|
| 0.05495 | G06 | Glabridin           | Plate4 | SARS-CoV-2 3CLpro | -1.2709001 |
| 0.0358  | G07 | Licochalcone A      | Plate4 | SARS-CoV-2 3CLpro | -2.5434615 |
| 0.01645 | G08 | Velpatasvir         | Plate4 | SARS-CoV-2 3CLpro | -3.8293133 |
| 0.0393  | G09 | Telaprevir          | Plate4 | SARS-CoV-2 3CLpro | -2.3108784 |
| 0.0612  | G10 | Odanacatib          | Plate4 | SARS-CoV-2 3CLpro | -0.8555733 |
| 0.08295 | G11 | Darunavir           | Plate4 | SARS-CoV-2 3CLpro | 0.58976409 |
| 0.0721  | H02 | Danoprevir          | Plate4 | SARS-CoV-2 3CLpro | -0.1312433 |
| 0.03045 | H03 | Nelfinavir Mesylate | Plate4 | SARS-CoV-2 3CLpro | -2.8989812 |
| 0.00735 | H04 | Oprozomib           | Plate4 | SARS-CoV-2 3CLpro | -4.4340292 |
| 0.0658  | H05 | AEBSF hydrochloride | Plate4 | SARS-CoV-2 3CLpro | -0.5498927 |
| 0.075   | H06 | Belnacasan          | Plate4 | SARS-CoV-2 3CLpro | 0.06146837 |
| 0.0761  | H07 | Z-DEVD-FMK          | Plate4 | SARS-CoV-2 3CLpro | 0.13456589 |
| 0.1242  | H08 | Z-FA-FMK            | Plate4 | SARS-CoV-2 3CLpro | 3.33092112 |
| 0.0698  | H09 | Trovirdine          | Plate4 | SARS-CoV-2 3CLpro | -0.2840835 |
| 0.0076  | H10 | MG132               | Plate4 | SARS-CoV-2 3CLpro | -4.4174161 |
| 0.05275 | H11 | Cabotegravir        | Plate4 | SARS-CoV-2 3CLpro | -1.4170951 |

**Supplementary Table 3. Structures of synthesized and structurally similar compounds for this study.**

| Compound   | Structure                                                                                                                                                                                                                                                                                                                                                                                                                                                            |
|------------|----------------------------------------------------------------------------------------------------------------------------------------------------------------------------------------------------------------------------------------------------------------------------------------------------------------------------------------------------------------------------------------------------------------------------------------------------------------------|
| AZVIII-30  | 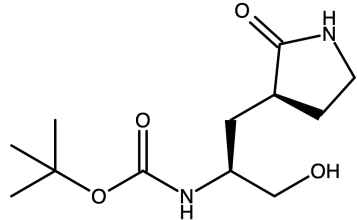 <p>The chemical structure of AZVIII-30 consists of a central chiral carbon atom bonded to four groups: a tert-butyl ester group (-O-C(=O)-C(CH<sub>3</sub>)<sub>3</sub>), a hydrogen atom (H), a 2-hydroxyethyl group (-CH<sub>2</sub>-CH<sub>2</sub>-OH), and a 2-imidazolidinonepropyl group (-CH<sub>2</sub>-CH<sub>2</sub>-CH<sub>2</sub>-N<sub>2</sub>H<sub>2</sub>-C=O).</p> |
| AZVIII-33B |  <p>The chemical structure of AZVIII-33B is a complex molecule featuring a central chiral carbon atom bonded to a tert-butyl ester group, a hydrogen atom, a 2-imidazolidinonepropyl group, and a side chain containing a secondary amide, a methyl group, and an ethyl ester group.</p>                                                                                           |
| AZVIII-34D |  <p>The chemical structure of AZVIII-34D is a highly complex molecule with multiple chiral centers. It features a tert-butyl ester group, a benzyl ester group, a secondary amide, a methyl group, and a 2-imidazolidinonepropyl group, all connected to a central chiral carbon atom.</p>                                                                                        |

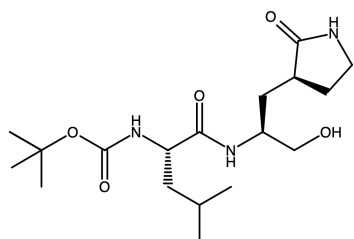

AZVIII-37A

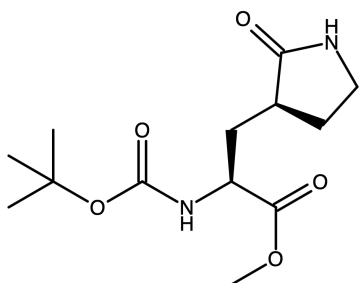

AZVIII-38

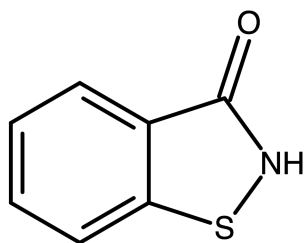

AZVIII-40A

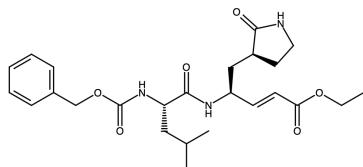

AZVIII-41A

|            |                                                                                     |
|------------|-------------------------------------------------------------------------------------|
| AZVIII-42  | 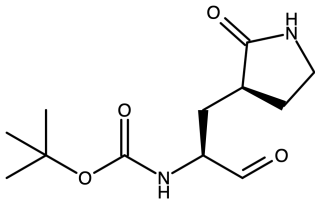   |
| AZVIII-43A |    |
| AZVIII-44B |  |
| AZVIII-44D |  |

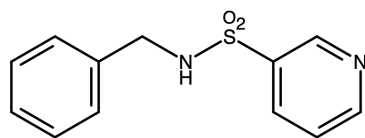

AZVIII-44E

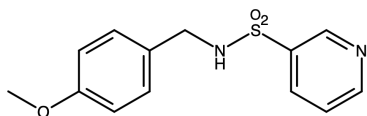

AZVIII-44H

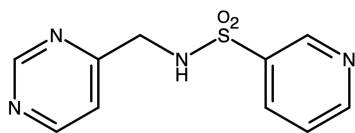

AZVIII-49C

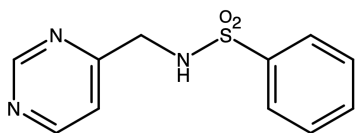

AZVIII-49F

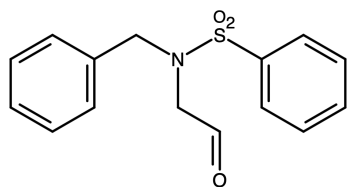

AZVIII-57D

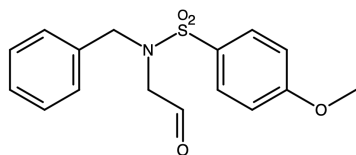

AZVIII-57G

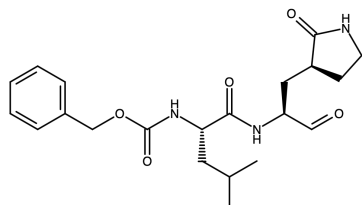

GC373

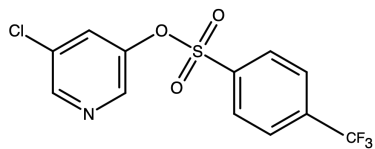

BTB07404



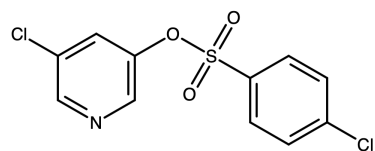

BTB07407

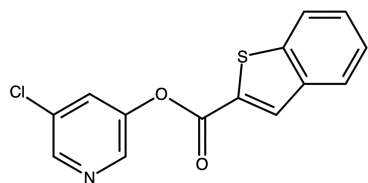

BTB07408

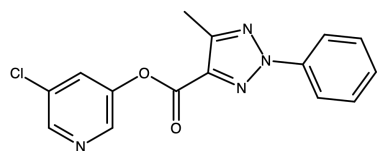

BTB07417

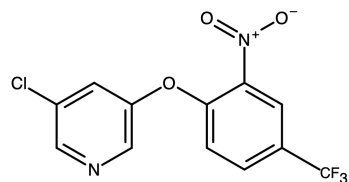

BTB07420

|          |                                                                                                                                                                                                                                                                                                                                                                                                                                            |
|----------|--------------------------------------------------------------------------------------------------------------------------------------------------------------------------------------------------------------------------------------------------------------------------------------------------------------------------------------------------------------------------------------------------------------------------------------------|
| BTB07421 | 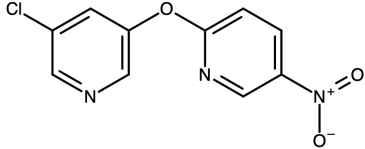 <p>Chemical structure of BTB07421: 4-(3-chloropyridin-2-yloxy)pyridin-2-yl nitro. It consists of a pyridine ring with a chlorine atom at the 3-position and an oxygen atom at the 2-position, which is linked to the 4-position of another pyridine ring. This second pyridine ring has a nitro group (-NO<sub>2</sub>) at the 2-position.</p>           |
| BTB07789 |  <p>Chemical structure of BTB07789: 4-(3-chloropyridin-2-yloxy)pyridin-2-yl acetamide. It features a pyridine ring with a chlorine atom at the 3-position and an oxygen atom at the 2-position, which is linked to the 4-position of another pyridine ring. This second pyridine ring has an acetamide group (-NHCOCH<sub>3</sub>) at the 2-position.</p> |
| CC42746  |  <p>Chemical structure of CC42746: 4-(3-pyridin-2-yloxy)furan-2-yl N,N-dimethylmethanamine. It consists of a pyridine ring with an oxygen atom at the 2-position, which is linked to the 4-position of a furan ring. The furan ring has an N,N-dimethylmethanamine group (-CH<sub>2</sub>N(CH<sub>3</sub>)<sub>2</sub>) at the 2-position.</p>          |
| GRL-0496 |  <p>Chemical structure of GRL-0496: 4-(3-chloropyridin-2-yloxy)indole-3-carboxamide. It features a pyridine ring with a chlorine atom at the 3-position and an oxygen atom at the 2-position, which is linked to the 4-position of an indole ring. The indole ring has a carboxamide group (-CONH<sub>2</sub>) at the 3-position.</p>                   |

|                  |                                                                                     |
|------------------|-------------------------------------------------------------------------------------|
| <p>MAC-30731</p> | 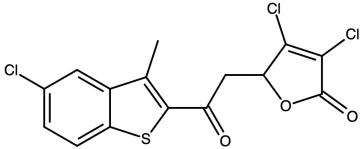   |
| <p>MAC-5576</p>  |    |
| <p>MAC-8120</p>  |  |
| <p>MAC2272</p>   |  |

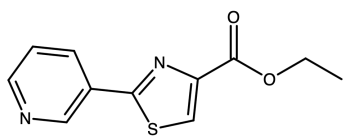

MWP00332

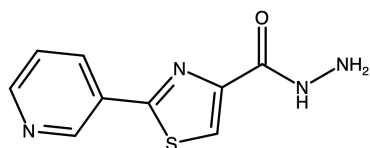

MWP00333

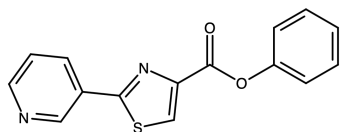

MWP00508

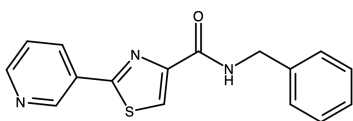

MWP00709

|          |                                                                                     |
|----------|-------------------------------------------------------------------------------------|
| MWP00710 | 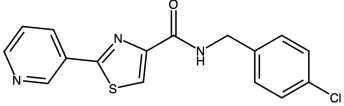   |
| NT 1-21  |    |
| NT 1-24  |  |
| NT 1-32  |  |

|          |                                                                                                                                           |
|----------|-------------------------------------------------------------------------------------------------------------------------------------------|
| SCR00533 | 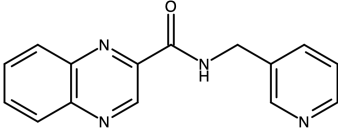 <chem>O=C(NCC1=CC=CN=C1)c2nc3ccccc3n2</chem>            |
| SEW03089 |  <chem>COc1ccc(cc1)C2=CN(C2)NC3=CC=CN=C3</chem>          |
| SPB06591 |  <chem>O=C(Nc1ccccc1)CCN2C(=O)OC3=CC=CN=C23</chem>     |
| SPB06593 |  <chem>O=C(Nc1cccc(Cl)c1)CCN2C(=O)OC3=CC=CN=C23</chem> |

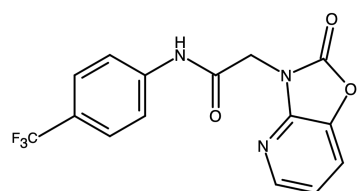

SPB06613

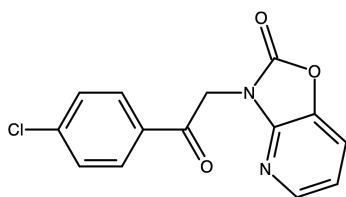

SPB06636

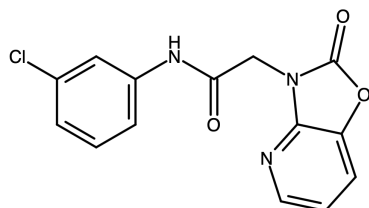

SPB08384

**Supplementary Table 4. DNA sequences of proteases used in this study**

| <b>Protease</b>        | <b>Sequence</b>                                                                                                                                                                                                                                                                                                                                                                                                                                                                                                                                                                                                                                                                                                                                                                                                                                                                                                                                                            |
|------------------------|----------------------------------------------------------------------------------------------------------------------------------------------------------------------------------------------------------------------------------------------------------------------------------------------------------------------------------------------------------------------------------------------------------------------------------------------------------------------------------------------------------------------------------------------------------------------------------------------------------------------------------------------------------------------------------------------------------------------------------------------------------------------------------------------------------------------------------------------------------------------------------------------------------------------------------------------------------------------------|
| SARS-CoV-2<br>3CLpro   | atgagtggttttagaaaaatggcattcccatctggtaaagttgagggttgatggtacaagtaactgtggtacaacta<br>cacttaacggctcttggcttgatgacgtagttactgtccaagacatgtagctgcacctctgaagacatgcttaaccct<br>aattatgaagattactcattcgtaagctaatcataatcttgggtacaggctggtaattgtcaactcagggttattgga<br>cattctatgcaaaattgtgtacttaagcttaaggttgatacagccaatcctaagacacctaagtataagttgttcgat<br>tcaaccaggacagacttttccagtgtagctgtttacaatgggtcaccatctgggtttaccaatgtgctatgaggccca<br>atctactattaagggttcattccttaatgggtcatgtggtagtggtggttttaacatagattatgactgtctcttttggac<br>atgcaccatatggaattaccaactggagttcatgctggcacagacttagaaggttaactttatggacccttttggta<br>ggcaaacagcacaagcagctggtacggacacaactattacagttaatgttttagcttggtgtacgctgctgttataa<br>atggagacaggtggttctcaatcgattaccacaactcttaatgactttaacctgtggtatgaagtacaattatgaa<br>ccttaacacaagacatgttgacatactaggacctcttctgctcaaacctggaaattgccgttttagatagtgtgcttc<br>atataaagaattactgcaaaatggatgaatggacgtaccatattgggtagtgctttattagaagatgaattacacct<br>ttgatgtgttagacaatgctcaggtgtactttccaataa |
| MERS-CoV<br>3CLpro     | atgagcgggttggtagaaaatgtcacatcccagtgagatgttgaggcttgatggttcagggtacctgcggtagcatg<br>actcttaatggctcttggcttgacaacacagctctgggtcccacgcacagtaatgtgccggctgaccagttgtctgatc<br>ctaattatgatgcctgttgatttctatgactaatcatagttcagtggtcaaaaacacattggcgctccagcaaaactgc<br>gtgttggctcatgcatgcaaggcactctttgaagttgactgtcgtatgttgtaaccctagcactccagcctacact<br>ttacaacagtgaaacctggcgcagcatttagtgttagcatgctataatggctgcgactggtaactcactgtgtg<br>aatgcccctaactacacaattaaggggtccttctgtgtggttctgtggtagtggtttacaccaaggagggtagtg<br>tgatcaatttctgttacatgcatcaaatggaacttgtaatggtacacataccgggtcagcattgatggtactatgtatg<br>gtgcctttatggataaacaagtgacccaagttcagttaacagacaaatactgcagtgtaatgtagtagcttggcttta<br>cgcagcaataacttaattggtgctgtggtttgtaaacctaatcgactagtggttttctttaaataatgggctcttggc<br>aaccaattcactgaattgttggcactcaatccgttgacatgttagctgtcaaacaggcgtgtctattgaacagctgc<br>ttatgctgacccaactgtatactgggtccagggaaagcaaatcctggcagttaccatgttgaagatgaattc<br>acacctgaggatgtaatatgcagattatgggtgtggttagcagtaa     |
| SARS-CoV<br>3CLpro     | atgagtggttttaggaaaatggcattcccgtcaggcaaggtgaaggggtgcatggtacaagtaacctgtggaacta<br>caactctaatggattgtggtggatgacacagataactgtccaagacatgctattgacagcagaagacatgctta<br>atcctaactatgaagatctgctcattcgcaaatccaacctagcttcttctggtcaggctggcaatgttcaactcgtgta<br>ttggccattctatgcaaaatgtctgcttaggcttaagttgatacttcaacctaaagacaccaagataaattgtcc<br>gatccaacctggtaaacattttagtcttagcatgctacaatgggtcaccatctgggtttatcagtggtccatgaga<br>cctaatacaccattaaaggtcttctccttaatggatcatgtggtagtggtggttttaacattgattatgctgctcttct<br>gctatgcatcatatggagctccaacaggagtacacgctggtactgacttagaaggtaaattctatggtccattgt<br>tgacagacaaactgcacaggctgcaggtacagacacaaccataacattaaatgtttggcatggctgtatgctgct<br>gttatcaatggtgatagggtgttcttaatagattcaccactcttgaatgactttaacctgtggcaatgaagtacaac<br>tatgaaccttgacacaagatcatgttgacatattggacctcttctgctcaaacaggaattgccgtcttagatgtg<br>tctgctttgaaagagctgctgcagaatggatgaatggctgactatcctggtagcactattttagaagatgagttta<br>caccattgatgtttagacaatgctctggtgttacctccaataa               |
| Bat-CoV-HKU9<br>3CLpro | atggccggcctgacacgtatggctcaccctcaggttagtagagccgtgcctgttaaagtaaatatggtccatga<br>ctctaatggtataggtggataatttgttatatgtcctaggcatgttatgtgttctagggatgagttagctaatcctgatt<br>accctcgttgtctatgagctgctaatatgatcttccagctgtctcaaatggctataatattcgtgttataggccatact<br>atggaaggtcgctttaaagctaacagttgatgtgaataatcctaaaacaccgcttattcattatagcgggtgagta<br>cgggtcaagctatgagttgtggcatgttatggtttaccaactgggtgtatagctgactttacggtcgaatggt<br>actatgagagcatcattttatggtctctgtggtagctctggcttctgcatgaatggcaagaagtcaattttgtacct<br>acaccagctgaattacaaatggtactcatactggtacagattttctggtgcttttatggtccattgaaagacaagc<br>aagtcctcaattagcggcgcctgattgtactataactgtaatgttttagcatggctttatgcagctgtgtaagtggtg<br>agaatggttttaaccaagctagatttaccggctgaattataatgtgctgtaagtacatgtgctcagtcagtaa<br>cgagtgaaagctgcaagtttgaaccactgcagctaaaacaggtatctctgttagcgcagctgttcagcgttga<br>aggtattgctctcagctggattttgtggcgtactattatgggtcctgctttagaggatgagcatacccgatgata<br>ttggccgtcaaatgtaggtgttaaatgcaataa                            |
| HCoV-NL63<br>3CLpro    | atgtctggtcttaagaagatggcacaacctctggtgtgttgagagatgtgtggtcgcgtctgttatggtagtagtctg<br>gcttaatggagtttggtaggtgacactgttactgtccttagacatgcatagcaccatcaaccactgttctattgattat                                                                                                                                                                                                                                                                                                                                                                                                                                                                                                                                                                                                                                                                                                                                                                                                          |



|                            |                                                                                                                                                                                                                                                                                                                                                                                                                                                                                                                                                                                                                                                                                                                                                                                                                                                                                                                                                                                            |
|----------------------------|--------------------------------------------------------------------------------------------------------------------------------------------------------------------------------------------------------------------------------------------------------------------------------------------------------------------------------------------------------------------------------------------------------------------------------------------------------------------------------------------------------------------------------------------------------------------------------------------------------------------------------------------------------------------------------------------------------------------------------------------------------------------------------------------------------------------------------------------------------------------------------------------------------------------------------------------------------------------------------------------|
|                            | <p>gatcatgcatatagtagtactatgctgttgataatcttcagtgcttataatgggtgcttctgggagttggtggttacaatg<br/> catgggtctgtggtgctgtaataagggttcacaatctaattgacatacacctaaacatgttttaaacgtgaaacctggt<br/> gattcttttaataatgtagcatggtatgaaggattgcatctgggtgttttgggttaatttacgtacaaactttactattaaag<br/> ttctttataaatggagcttggttctcctgggtataatgtagaaatgatggtagtggtagttgagttttgatttacaccaaat<br/> gagttaggtagtggtgctcatgttggtctgattttactggtagtggtaggtaatttgatgaccaacctagtttgcaagtt<br/> gagagtgccaaccttatgctatcagataatgtgtgctttttgtagctgctttggaatgggtgtaggtggtggtgctg<br/> ttcaactagagttaatgtgatggttttaagaatgggctatggctaaggttatacaaggtttctagtggtgagtgctatt<br/> ctatgttgagcaaaaactgggttagtggtgaacaattgttagcttccattcaacatctcatgaaggtttggtggtgta<br/> aaaacatactggttattctagttatgtgatgagttcacactagctgaagttggaagcagatgatggtgtaactgca<br/> aataa</p>                                                                                                                                                                              |
| IBV 3CLpro                 | <p>atggctggttttaagaaactagttgctcctagtagtctgttgagaagtcattgttagtctcttatagaggcagtaat<br/> cttaatggattggtggtgattccatctactgtccacgacatgtattaggttaagtttaggtgaccaatggagtgga<br/> tgtacttagccttgctaataatcatgaattgaggtgtaactcataatgggttactttgaatgtgtcagcaggcgttta<br/> aagggtgcattactgattttacagactgcagtagccaatgctgatacaccgaagtataaattttgaaagcaaatgt<br/> gggtgatagttcacaatagcttctctatgggtgacagttataggactctacccgctactatgcttctaatggaact<br/> atagagcatcgttctgctggagcatggttgcagtaggttttaatatagaaaagggttagtaaattttactacatg<br/> caccatctagagttacctaatgcattacacacaggaactgacctaatgggtgagttttatggtggttataatagatgaa<br/> gaggtgctcagaaagtcaaccgataaattagttactaataatgtttggcatggctttatgcagcaattatagttg<br/> aaagagagtagttttcaacaccaaattgctgaaagtactactatcagattgatgattataaagtgggcagggt<br/> gataatggtttacatcattgtgaagctgcactgctattactaaattaagtgtataacaggagtagatgttgaaactc<br/> cttcgactattatggtaaaaagtgcaaatgggtagtgacctatgtttggacaataaattttgaggatgaaatga<br/> caccggaatctgttttaacaggtagggtggttaggttacaataa</p>  |
| SARS-CoV-2<br>3CLpro C145A | <p>atgagtggttttagaaaaatggcattcccactctggtaaagttgaggggtgatggtacaagtaactgtggtacaacta<br/> cacttaacggctttggctgatgacgtagttactgtccaagacatgtgatctgcacctctgaagacatgcttaacct<br/> aattatgaagattactcattcgaagtctaatacataattcttggtagcaggctggaatgtcaactcagggtattgga<br/> cattctatgcaaaatgtgacttaagcttaaggtgatacagccaatcctaagacacctaagtataagttgtcgc<br/> tcaaccaggacagacttttcagtgtagctgtttacaatgggtcaccatctggtgtttaccaatgtgctatgaggcca<br/> atctactattaagggtcattccttaatggttcaGCCggtagtggttttaacatagattatgactgtgctctttgtt<br/> acatgcaccataggaattaccaactggagttcatgctggcacagacttagaaggtaactttatggacctttgttga<br/> caggcaaacagcacaagcagctggtacggacacaactattacagttaatgttttagctggtgtacgctgctggtat<br/> aaatggagacaggtggttctcaatcgattaccacaactcttaatgactttaacctgtgctatgaagtacaattatg<br/> aaccttaacacaagacctgtgacatactaggacctcttctgctcaactggaattgccgttttagatagtgctgct<br/> tcattaaaagaattactgcaaaatggtatgaatggacgtaccatattgggtagtgctttatagaagatgaattacac<br/> ctttgtatggttagacaatgctcagggtgactttccaataa</p>    |
| MERS-CoV<br>3CLpro C148A   | <p>atgagcgggttggtgaaaatgacacatcccagtgagatgttgaggctgtatggttcagggtacctgcggtagcatg<br/> actcctaattggtctttggctgacaacacagctctggtgccacgacacgtaatgtgccggctgaccagttgctgatc<br/> ctaattatgatgcctgttgattctatgactaatcatagtttcagtggtgcaaaaacacattggcgctccagcaactg<br/> gtgtgtggtcatgccaatgcaaggcactctttgaagttgactgtcgtatgttctaacctagcactccagcctacact<br/> ttacaacagtgaaacctggcgcagcatttagtgttagcatgctataatggctgctcggactggtacattcactgtgt<br/> aatgcccctaactacacaattaagggtccttctgtgtggttctGCCggtagtggtttacaccaaggagggtg<br/> gtgtgatcaattctgttacatgcatcaaatggaacttgctaattggtacacataaccggtcagcattgtggtactatg<br/> atggtgctttatggataaacaagtgaccaagttcagttacagacaaactgtagttaaattagtagcttggc<br/> tttacgcagcaataactaatggtgctgctggtttgtaaaacctaatgcactagtggtttctttaaattgaatgggctct<br/> gccaaccaattcactgaattgtggcactcaatccgttgacatgttagctgtcaaaacaggcgttgctattgaacag<br/> ctgctttatgcatcaacaactgtatactgggtccagggaaagcaaatcctggcagtagctattggaagatga<br/> attcacacctgaggatgtaatatgcagattatgggtggttatgcagtaa</p> |
| SARS-CoV<br>3CLpro C145A   | <p>atgagtggttttaggaaaatggcattcccgtcaggcaagttgaagggtgcatggtacaagtaacctgtggaacta<br/> caactcctaattgattggtggtgacacagataactgtccaagacatgctattgacagcagaagacatgctta<br/> atcctaactatgaagatctgctcattcgcaaatccaacctagcttcttggcaggctggcaatgttcaactcgtgta<br/> ttggccattctatgcaaaatgtctgcttaggcttaagttgatacttcaacctaaagacaccaagataaattgtcc<br/> gatccaacctggtaaaactttcagtttagcatgctacaatggttccacctggtgtttatcagtggtccatgaga<br/> cctaatacaccattaaagggtcttcttaattgatcaGCCggtagtggttttaacattgattatgattgctgctt<br/> ctgctatgcatcatatggagctccaacaggagtagcagctggttagcttagaaggtaattctatggtccattt</p>                                                                                                                                                                                                                                                                                                                                                                                                         |

|                              |                                                                                                                                                                                                                                                                                                                                                                                                                                                                                                                                                                                                                                                                                                                                                                                                                                                                                                                                                                                                     |
|------------------------------|-----------------------------------------------------------------------------------------------------------------------------------------------------------------------------------------------------------------------------------------------------------------------------------------------------------------------------------------------------------------------------------------------------------------------------------------------------------------------------------------------------------------------------------------------------------------------------------------------------------------------------------------------------------------------------------------------------------------------------------------------------------------------------------------------------------------------------------------------------------------------------------------------------------------------------------------------------------------------------------------------------|
|                              | <p>gttgacagacaaactgcacaggctgcaggtacagacacaaccataacattaaatgtttggcatggctgtatgctg<br/> ctgttatcaatgggataggtggttcttaatagattcaccactactttgaatgactttaaccttggcaatgaagtaca<br/> actatgaaccttgacacaagatcatgttgacatattggacctcttctgctcaaacaggaattgccgtcttagatag<br/> tgtgctgctttaaagagctgctgcagaatggatgaatggctgactatccttggtagcactatttagaagatgagtt<br/> tacaccattgatgtttagacaatgctctggtgttacctccaataa</p>                                                                                                                                                                                                                                                                                                                                                                                                                                                                                                                                                                                                        |
| Bat-CoV-HKU9<br>3CLpro C145A | <p>atggccggcctgacacgtatggctcaccctcaggttagtagagccgtgcctgttaaagtaaattatggttccatga<br/> ctctaatggatatagggtggataaatttggatatagtcctaggtcatgttatgttcttagggatgagttagctaatcctgatt<br/> accctcgttctatgagcagctgtaattatgattttcacgtgtctcaaaatggcataatattcgtgttataggccatact<br/> atggaaggtcgtttaaagctaacagttgatgtgaataatcctaaaacacccgcttattcattatacgggtgagta<br/> cgggtcaagctatgagtttggcatgttatgatggtttaccaactgggtgtatatacgtgcactttacggctgaatggt<br/> actatgagagcatcattttatgtggctctGCCggtagtctggcttctgcatgaatggcaaagaagtcaattttgta<br/> cctacaccagctgaattaccaatgttactatactggtagacagatcttctgggtctttatggtccattgaagacaa<br/> gcaagtgcctcaattagcggcgcctgattgtactataactgttaatgttttagcatggctttagcagctgtttaagtg<br/> tgagaattggttttaaccaagtctagtattccaggctgaatttaataatgtgctgttaagtacatgtgtcagtcagta<br/> acgagtgaaagctgcaagtttgaaccactgcagctaaaacaggtatctctgttagcgcagcttccagcgttg<br/> aaggattgctctcagctggattttgtggccgtactattatgggctcctgttcttagaggatgagcatacaccgtatgat<br/> attggccgcaaatgttaggtgttaattgcaataa</p>       |
| HCoV-NL63<br>3CLpro C144A    | <p>atgtctggtcttaagaagatggcacaaccatcgggtgtgttgagagatgtgtggtcgcgctgtttatgtagtactgt<br/> gcttaatggagttggttaggtgacactgttactgtcctagacatgcatagcaccatcaaccactgttcttattgattat<br/> gatcatgcataatagctatgctgttgacataaattttcagtgcttataatgggtcttcttgggagttgtgtgttacaatg<br/> catggttctgtgtgctattaaggtttcacaatctaattgacatacacctaaacatgttttaaacctgaaacctgggt<br/> gattcttttaataatttagcatgttatgaaggtatgcatctgggttttgggttaatttacgtacaaccttactataaagg<br/> ttctttataaatggagctGCCggttctcctgggtataatgttagaaatgatggtagtgtgagttttgatttacaccaa<br/> attgagtaggtagtggtgctatgttggctgattttactggtagtgtttatggtaattttgatgaccaaccttagttgcaa<br/> gttgagagtgccaacctatgctatcagataatgtgtgctttttgtatgctgcttggtaagttgtaggtgggtggtg<br/> cgttcaactagagtaattgtgatggttttaataatgggctatggctaattggtatacaaggtttctagttgtagtgct<br/> attctattttggcagcaaaaactgggttaggtgtaacaattgttagctccattcaacatctcatgaaggtttgggtggt<br/> aaaaacatactggttattctagttatgtgatgagttcacactagctgaagttgtaagcagatgtatggtgtaactg<br/> caataa</p>                         |
| IBV 3CLpro<br>C143A          | <p>atggctggttttaagaaactagttgctcctagtagtctgttgagaagtgcattgttagtctcttatagaggcagtaat<br/> ctaatggattgtggtgggtgattccatctactgtccacgacatgtattaggttaagtttagtggtgaccaatggagtga<br/> tgtacttagccttgctaataatcatgaattgaggtgtaactcataatgggttactttgaatgtgtcagcagggcgtta<br/> aaggggtcattactgattttacagactgcagtagccaatgctgatacaccgaagtataaattttgaaagcaaatgt<br/> ggtagatgtttcacaatagctgtcttattgggtgacagttataggactctacccggtactatgcttctaatggaact<br/> attagagcatcgtttctgtgtagcaGCCggttcagtaggttttaataatagaaaaggggttagtaaatcttactaca<br/> tgcaccatctagagttacctaatacattacacacaggaactgacctaattgggtgagttttatggtggttatatagatga<br/> agaggtgtcagaaagtcaaccgataaattagttactaataatattttggcatggctttagcagcaattattagtg<br/> ttaaagagagtagttttcaacacaaaatggctgaaagtactactatcagttatgatattataataagtgggcag<br/> gtgataatggtttacatcattgtaagctgcactgtattactaaattaagtgtataacaggagtagatgtttgtaaac<br/> tcctcgtactattatggtaaaagtgcacaatgggtagtgaccctattttgggacaataaattttgaggatgaaat<br/> gacaccggaatcgttttaacaggtaggtggttaggttacaataa</p> |
